1 Quantifying the unquantifiable:

2 why Hymenoptera – not Coleoptera – is the most speciose animal order

3

4 Andrew A. Forbes, Robin K. Bagley, Marc A. Beer, Alaine C. Hippee, & Heather A. Widmayer

5 University of Iowa, Department of Biology, 434 Biology Building, Iowa City, IA 52242

6

7 Corresponding author:

8 Andrew Forbes

9

10 Email address: [andrew-forbes@uiowa.edu](mailto:andrew-forbes@uiowa.edu)

11

12

13

14 **Abstract:** We challenge the oft-repeated claim that the beetles (Coleoptera) are the most species-  
15 rich order of animals. Instead, we assert that another order of insects, the Hymenoptera, are more  
16 speciose, due in large part to the massively diverse but relatively poorly known parasitoid wasps.  
17 The idea that the beetles have more species than other orders is primarily based on their  
18 respective collection histories and the relative availability of taxonomic resources, which both  
19 disfavor parasitoid wasps. Since it is unreasonable to directly compare numbers of described  
20 species in each order, we present a simple logical model that shows how the specialization of  
21 many parasitic wasps on their hosts suggests few scenarios in which there would be more beetle  
22 species than parasitic wasp species. We couple this model with an accounting of what we call the  
23 “genus-specific parasitoid-host ratio” from four well-studied genera of insect hosts, a metric by  
24 which to generate extremely conservative estimates of the average number of parasitic wasp  
25 species attacking a given beetle or other insect host species. Synthesis of these two approaches  
26 suggests that the Hymenoptera may have 2.5 - 3.2x more species than the Coleoptera.

27

28

29

30

31

32

33

34 “...if the micro-hymenopterists would get off their lazy asses  
35 and start describing species, there would be more micro-  
36 Hymenoptera than there are Coleoptera.”

37

38 – Terry Erwin (in Rice, 2015)

39

40 The beetles (order Coleoptera), have historically (Kirby & Spence, 1818; Westwood, 1833;  
41 Hutchinson, 1959) and contemporaneously (Farrell, 1998; Hunt et al., 2007; McKenna & Farrell,  
42 2009; Zhang, 2011; Wiens, Lapoint & Whiteman, 2015; Zhang et al., 2018) been described as  
43 the most speciose order of animals on Earth. The great diversity of beetles was sufficiently  
44 established by the middle of last century such that J.B.S. Haldane (possibly apocryphally<sup>1</sup>)  
45 quipped that an intelligent creator of life must have had “...an inordinate fondness for beetles”  
46 (Gould, 1993). However, what evidence underlies the claim that the Coleoptera are more  
47 species-rich than the other insect orders? Certainly, more species of beetles (>350,000) have  
48 been *described* than any other order of animal, insect or otherwise (Bouchard et al., 2009), but  
49 does this reflect their actual diversity relative to other insects?

50 Why are beetles thought to be so diverse in the first place? In part, historical biases in beetle  
51 collecting and an associated accumulation of taxonomic resources for the Coleoptera may have  
52 had an outsized influence on our perception of diversity. In the mid-to-late 1800s, beetles were  
53 prized among insects for their collectability. Many landed gentlemen - including, notably,  
54 Charles Darwin - collected beetles for sport and would make a great show of comparing the sizes

---

<sup>1</sup> Whether or not Haldane ever actually said it exactly in this way is unresolved (Gould, 1993). This phrase does not occur in any of Haldane’s writing, but he does write that “The Creator would appear as endowed with a passion for stars, on the one hand, and for beetles on the other.” (Haldane, 1949)

55 of their respective collections (Browne, 1996; Sheppard, 2004). This preconception was then  
56 reinforced by studies that extrapolated from specific, targeted collections of insect diversity that  
57 focused on beetles. Of these, perhaps the highest in profile was a study conducted by Terry  
58 Erwin. Erwin (1982) used an insecticide to fog the canopies of 19 individual *Luehea seemannii*  
59 trees in a Panamanian rainforest and then collected and identified the insect species that fell out  
60 of those trees. After having identified the proportion of the beetle species that were apparently  
61 host-specific to *L. seemannii* (163 of 955), he estimated that there might be as many as 12.2  
62 million beetle species in the tropics. Similar studies seeking to estimate global insect diversity  
63 have also tended to emphasize beetles (e.g., Ødegaard, 2000; Stork et al., 2015).

64 Nevertheless, some previous work has challenged the canon, with various authors suggesting –  
65 though never quite insisting – that the Hymenoptera may be more speciose than the Coleoptera  
66 (LaSalle, 1993; LaSalle & Gauld, 1993; Gaston, 1993; Austin & Dowton, 2000). The premise  
67 behind this suggestion is that most of the larvae of the Parasitica (one of the two infraorders of  
68 apocritan Hymenoptera; the other is the Aculeata, which includes ants, bees, and wasps), are  
69 obligate parasites of insect and other arthropod hosts that feed on the host’s tissue until the host  
70 dies ( $\approx$  “parasitoids”). Why is this parasitic life history relevant to the Hymenoptera’s  
71 proportional contribution to insect diversity? Simply put, species of parasitoid Hymenoptera  
72 (including the Parasitica, as well as some other groups such as the Orussidae and some  
73 Chrysididae) attack all orders of insects as well as some non-insect arthropods (Gibson, Huber  
74 & Woolley, 1997; Wharton, Marsh & Sharkey, 1997; Noyes, 2017), and, reciprocally, most  
75 holometabolous insect species are attacked by at least one – and often many more than one –  
76 species of hymenopteran parasitoid (Schoenly, 1990; Memmott & Godfray, 1993). For instance,  
77 Hawkins and Lawton (1987) examined parasitoid communities associated with 158 genera of

78 British insects across five different orders, and found that parasitoid species richness ranged from  
79 2.64 – 9.40 per host species across different host insect orders.

80 If parasitoid wasps are ubiquitous and most hosts are attacked by many different species, why is  
81 there any debate at all about the Hymenoptera being more diverse than other orders? One reason  
82 may be that estimates of the regional and global species-richness of parasitoid wasps remain  
83 elusive. Their small size and a relative paucity of taxonomic resources have left the parasitoid  
84 Hymenoptera relatively under-described compared to other insect orders (Gaston, 1993; Huber,  
85 2009). As a consequence, when collection-based estimates of regional insect diversity have been  
86 attempted, they have often excluded all but the largest and easiest-to identify families of parasitic  
87 Hymenoptera (e.g., Novotny et al., 2002; Pietsch et al., 2003; Basset et al., 2012; though see  
88 Gaston, 1991; Stork, 1991).

89 A second reason for uncertainty regarding the species richness of the parasitoid Hymenoptera is  
90 that their host ranges are often unknown. While it may be true that most insects harbor many  
91 parasitoid species, the question remains whether these parasitoid communities are exclusively  
92 composed of oligophagous or polyphagous wasps that attack many hosts, or if instead the  
93 average insect host tends to have some number of specialist wasps among its many predators  
94 (**Figure 1**). Only in the latter case would one be able to confidently assert that the Hymenoptera  
95 is the largest of the insect orders.

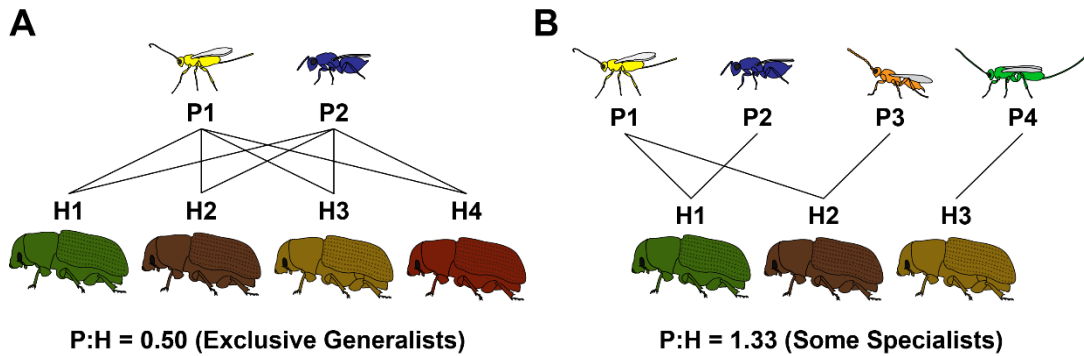

96

97

98

99

100

101

102

103

104

105

106

107

108

109

110

111

112

113

**Figure 1.** An illustration of how uncertainty about specialist vs. generalist

behaviors might lead to misleading conclusions about parasitoid species

richness. In panel A, each host species (differently colored beetles) is attacked

by two parasitoids. However, because all parasitoids attack all four beetles the

overall species richness of hosts exceeds that of the parasitoids (i.e.,  $P:H < 1$ ).

In panel B, while some hosts have only one parasitoid, overall parasitoid

richness exceeds host richness ( $P:H > 1$ ) because some parasitoids are more

specialized.

How then to approach this question without asking the micro-hymenopterists (and the

coleopterists, dipterists, lepidopterists, etc.) to hurry up and describe all of the world's insect

species? We suggest two complementary approaches: 1) mathematically describing the values of

parasitoid-to-host ("P:H") ratios that would support – or contradict – the notion that the

Hymenoptera is the most speciose insect order and 2) tabulating – wherever possible – actual

P:H ratios for various genera of host insects.

**What parasitoid-to-host ratios would suggest that the Hymenoptera are more species-rich**

**than other insect orders?**

114 For the Hymenoptera to be the largest order of insects, the global ratio of wasp parasitoids to  
115 hosts (P:H) need not – in fact – equal or exceed 1.0. Indeed, a global P:H of 1.0 (i.e., an average  
116 of one unique hymenopteran parasitoid species for each other insect species) would mean that  
117 parasitoids account for a full half of all insects. Instead, P:H ratios need only reach values such  
118 that the Hymenoptera are more species-rich than the next largest order (which, for the sake of  
119 argument, we will assume is the Coleoptera). Here, we work towards finding parameters that  
120 describe that space. First, it will be true that:

121 Equation 1: 
$$I = 1 - (P + C)$$

122 Where  $P$  is the proportion of all insect species that are parasitoid Hymenoptera,  $C$  is the  
123 proportion of insects that are Coleoptera, and  $I$  is the remaining proportion of insect species  
124 (**Figure 2 A**). Note that  $I$  includes the non-parasitoid Hymenoptera while both  $I$  and  $P$  exclude  
125 the many Hymenoptera that are parasitic on other parasitoids (“hyperparasitoids”).

126 Additionally, because of the intimate relationship between parasitoids and their hosts, we can  
127 describe the proportion of species that are parasitoid Hymenoptera using the following  
128 expression:

129 Equation 2: 
$$P = C(p_C) + I(p_I)$$

130 , where  $p_C$  and  $p_I$  represent the mean P:H ratios for all coleopterans and all non-coleopterans,  
131 respectively. The true values of  $p_C$  and  $p_I$  are unknowable, but can be estimated (see next  
132 section), and their use in this way allows for exploration of the ranges of P:H ratios that would  
133 result in different relative numbers of Hymenoptera and Coleoptera. Equation 2 again excludes  
134 hyperparasitoids, as well as parasitoids of non-insect arthropods, which makes  $P$  a conservative  
135 estimate of the proportion of insect species that are parasitoids.

136 Given these two relationships, we can substitute Eq.1 into Eq. 2:

137 Equation 3: 
$$P = C(p_C) + p_I - p_I(P + C)$$

138 Equation 3 allows us to find the values of  $p_C$  and  $p_I$  that result in a  $P > C$  or vice versa. As  
139 shown in **Figure 2**, the space where  $P > C$  includes a substantial area where  $p_C$  or  $p_I$  (or both)  
140 can be  $< 1$ . For instance, if the Coleoptera make up 25% of all insects, as suggested by many  
141 contemporary authors (Hamilton et al., 2013; Stork et al., 2015), a  $p_C$  of only 0.25 (or one  
142 species-specialist parasitoid for every four beetle species), coupled with a  $p_I$  of 0.50, results in  $P$   
143  $= C$  (and the many tens of thousands of non-parasitoid Hymenoptera will then tip the scale in  
144 their favor). Even if the Coleoptera amount to 40% of the insects, which reflects the percentage  
145 of currently-described insect species that are beetles, there will be more parasitoid Hymenoptera  
146 than beetles if  $p_C$  and  $p_I$  are equal to or in excess of 0.67 (two specialist parasitoid species for  
147 every three host species).



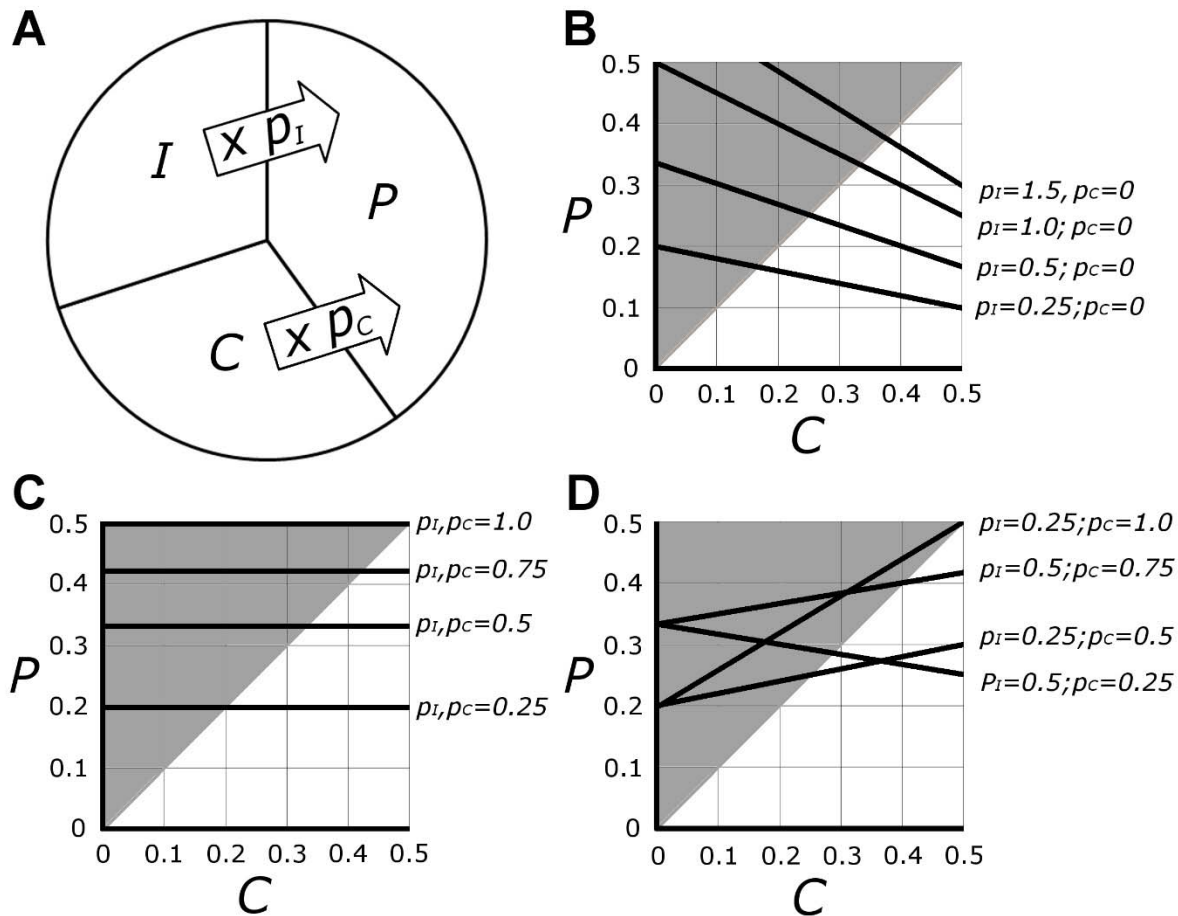

148

149

150

151

152

153

154

155

156

157

158

**Figure 2.** Representations of the space where the number of parasitoid wasp species would outnumber the Coleoptera, given different parasitoid-to-host ratios for coleopteran hosts and for other insect hosts. A) Pictorial representation of the model, wherein the total number of parasitoid species ( $P$ ) will be the sum of the number of species of Coleoptera ( $C$ ) and of other insects ( $I$ ), each first multiplied by their respective overall parasitoid-to-host ratio ( $p_C$  or  $p_I$ ); B) Black lines show results of the model for four different values of  $p_I$  and with  $p_C$  held at zero (i.e., when the average coleopteran has no specialist parasitoids). Where black lines overlap with gray shaded areas represents space where  $P > C$ ; C) Results of four different scenarios in which

159  $p_C$  and  $p_I$  are equal; D) Some additional combinations of  $p_C$  and  $p_I$ . Though  
160 both axes could continue to 1.0, some high values of  $P$  and  $C$  are not  
161 mathematically possible or biologically likely, and at  $P$  or  $C$  values above 0.5  
162 the question about relative species-richness becomes moot.

163

164 Another way to explore the values of  $p_C$  and  $p_I$  at which  $P$  will be greater than  $C$  is find the  
165 moments when the two will be equal. If we substitute  $C$  for  $P$  into Eq.3, we get:

166 Equation 4: 
$$p_C = 1 + 2p_I - \frac{p_I}{C}$$

167 We can then plot  $p_C$  vs  $p_I$  for values of  $C$  between 0 and 0.5 (**Figure 3**). Here, each line  
168 represents moments when  $P = C$ , such that the area above and to the right of each line represents  
169 values of  $p_C$  and  $p_I$  that result in a  $P > C$ . Here again,  $p_C$  and  $p_I$  need not be particularly large for  
170 the parasitoid Hymenoptera to exceed the species richness of the Coleoptera. For instance, if one  
171 quarter of all insects are beetles,  $p_C$  and  $p_I$  need only exceed 0.4 (the equivalent of two  
172 parasitoid species for every five host species).

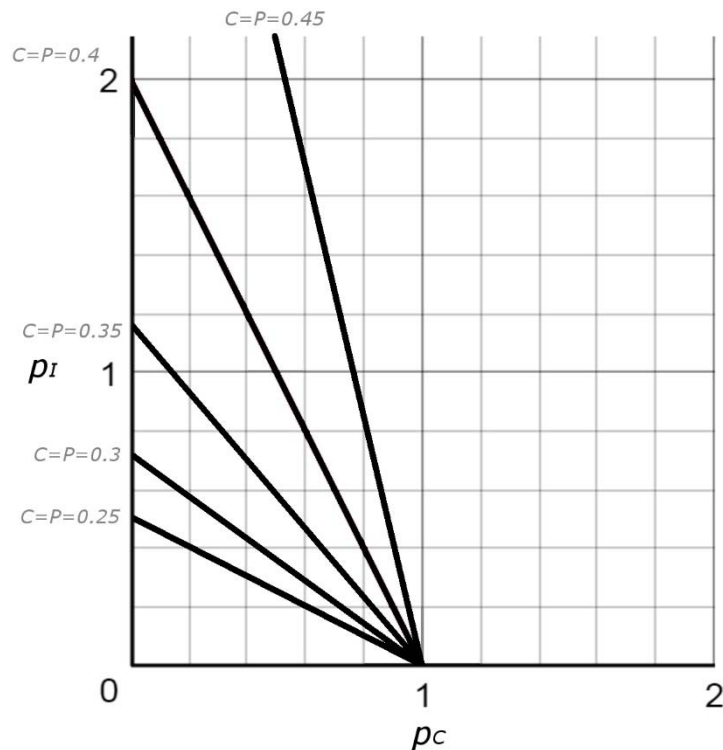

173

174

175

176

177

178

179

180

181

### What do actual P:H ratios look like in nature?

182

183

184

The next question becomes: can we estimate parasitoid: host ratios (e.g.,  $p_C$ ,  $p_I$ ) for different

host insects? Quantifying global P:H ratios for entire insect orders is as unapproachable as the

task of counting all of the living insect species: not only are most Hymenoptera undescribed, host

185 records for described species are often incomplete, such that multiplying each host species by its  
186 supposed number of specialist parasitoids may often inadvertently include parasitoids that share  
187 hosts (**Figure 4**). While this is problematic, recognition of the problem helps present paths  
188 forward. For indeed, *some* host-parasitoid systems are exceedingly well studied and well-  
189 understood, such that we can be reasonably confident about the completeness of the host records  
190 of at least some parasitoids. With this information, we can calculate a metric that we call the  
191 genus-specialist parasitoid:host ratio. This metric interrogates all members of a host insect genus  
192 in the same geographic region and identifies all of the parasitoids known to attack only members  
193 of that genus (the “genus-specialist” parasitoids). Because this P:H ratio ignores all parasitoids  
194 known to attack any extra-generic host – as well as those whose host range is unknown or has  
195 been incompletely studied – it is therefore an extremely conservative estimate of the overall P:H  
196 ratio for an insect genus.

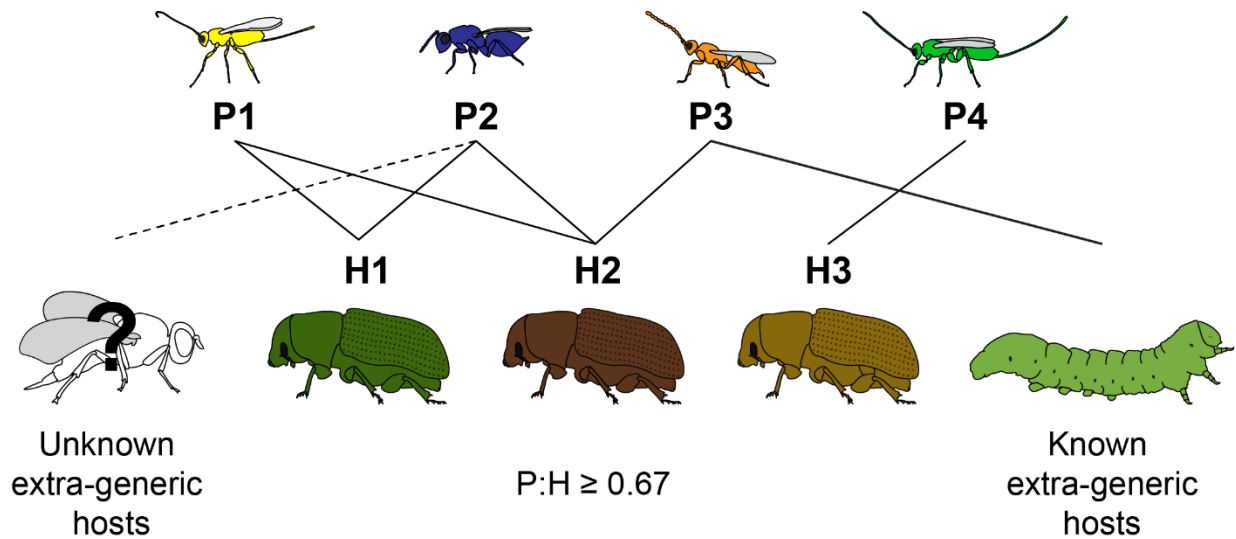

198 **Figure 4.** Known genus-specialist parasitoids can be used to calculate a  
199 minimum P:H ratio for an insect host genus. The focal beetle genus H (three  
200 species) has four known parasitoids, P1-P4. P1 and P4 are relatively well-

201 studied, and known to be genus-specialists, attacking only hosts in this beetle  
202 genus. P3 has some known extra-generic hosts, while the host range of P2 is  
203 poorly studied and unknown extra-generic hosts may exist. For the purposes  
204 of estimating a genus-specialist P:H, one would therefore use only P1 and P4,  
205 such that a minimum P:H for this beetle genus would be  $2/3$ , or 0.67. Note  
206 that if the total number and identities of extra-generic hosts were known for  
207 P2 and P3, a “true” P:H for the genus could be calculated (see **Synthesis**,  
208 below).

209  
210 Below, we present four case studies, representing host-parasitoid systems with records  
211 sufficiently complete to allow for calculation of genus-specialist parasitoid:host ratios. For each  
212 system, we focus on a single host genus in North America. We restricted geography so that  
213 parasitoid numbers would not be inflated by large biogeographic differences between hosts in  
214 their parasitoid assemblages. North America was chosen because sampling is relatively strong,  
215 and several robust resources exist for Nearctic parasitoids (e.g., Peck, 1963; Krombein et al.,  
216 1979; Noyes, 2017).

217 For each system, we searched for all literature that mentioned the name of the host genus (or  
218 historical synonyms) and either “parasite” or “parasitoid” and compiled a database of records,  
219 performing reticulated searches on each parasitoid species name as it was added to the database  
220 in order to determine known parasitoids host ranges. From among all parasitoid records, we  
221 classified parasitoids as “genus-specialists” if they had only ever been reared from hosts in this  
222 same genus. We then split these “genus-specialists” into two groups: those for which an  
223 argument can be made that they do not have unknown extra-generic hosts, and those that were

224 “possible genus-specialists” but for which records were less complete. Non-hymenopteran  
225 parasitoids (e.g., Tachinidae) were excluded, but in any case were only present for two of the  
226 four hosts we examined (*Malacosoma* and *Neodiprion*), and generally do not have the  
227 taxonomically cosmopolitan host ranges of the hymenopteran parasitoids. For cases where host  
228 genera were found on multiple continents, only host species in North America were included in  
229 the study, and to be conservative, a parasitoid was still considered “generalist” if it occurred on  
230 an extra-generic host species outside of North America. Introduced host species were noted but  
231 not counted in host lists, as they do not represent long-term host-parasite relationships.  
232 Introduced parasitoid species were included in generalist lists, regardless of whether they were  
233 specialists on that genus in North America or elsewhere. We describe each system below and  
234 refer the reader to Supplemental Materials for species lists, specialist / generalist classifications,  
235 and citations. A summary of data across the four genera can be found in **Table 1**.

### 236 **System 1: *Rhagoletis* (Diptera: Tephritidae)**

237 Many North American *Rhagoletis* flies are pests of agriculturally-important fruits. Eggs are  
238 deposited in ripening fruits by the female fly, and larvae develop through several instars while  
239 feeding on fruit pulp (Bush, 1966). For most species, larvae then exit the fruit and pupate in the  
240 soil. Parasitoids are known from egg, larval and pupal stages of many *Rhagoletis* species.  
241 Several studies have described the parasitoid communities associated with *Rhagoletis*  
242 agricultural pest species (e.g., Lathrop & Newton, 1933; Bush, 1966; Cameron & Morrison,  
243 1974; Wharton & Marsh, 1978; Feder, 1995), though records of parasitoids of non-pest species  
244 also exist (e.g., Rull et al., 2009; Forbes, Hood & Feder, 2010; Forbes et al., 2012). Moreover,  
245 many of the associated parasitoid species are well-studied in their own right, with robust records

246 of their biology, ecology, and host-ranges (Wharton & Marsh, 1978; Muesebeck, 1980; Forbes et  
247 al., 2009; Wharton & Yoder, 2017).

248 Of the 24 species of North American *Rhagoletis* flies, 16 have a published record of parasitoid  
249 associations. Across these 16 flies, we found records of 39 parasitoid species, among which 24  
250 “genus-specialists” have been described only from North American *Rhagoletis* and no other  
251 insect host (**Supplemental Table 1**). Of these, we set aside three “possible” genus-specialist  
252 species that did not have a strong collection record and for which host records may possibly be  
253 incomplete. The remaining set of genus-specialists included 14 braconids (genera *Diachasma*,  
254 *Diachasmimorpha*, *Utetes*, and *Opius*), six diapiids (genus *Coptera*), and a pteromalid (genus  
255 *Halticoptera*). The genus-specialist P:H ratio for *Rhagoletis* is therefore either 1.31 (21/16), or  
256 1.50 (24/16), depending on whether “possible genus-specialists” are included. An extra-  
257 conservative P:H ratio might also include the eight *Rhagoletis* hosts that have no record of  
258 parasitoids ( $P:H = 21/24 = 0.88$ ), though this almost certainly ignores some number of unknown  
259 genus-specialist parasitoids.

260 Some of the 15 “generalist” parasitoids of *Rhagoletis* have been reared from a diverse set of  
261 extra-generic hosts, but in some cases only from one other fruit-infesting tephritid (e.g.,  
262 *Phygadeuon epochrae* and *Coptera evansi*, both of which have only been reared from *Rhagoletis*  
263 and from *Epochra canadensis* [Diptera: Tephritidae]). These 15 “generalists” are listed in  
264 **Supplemental Table 1**.

## 265 **System 2: *Malacosoma* (Lepidoptera: Lasiocampidae)**

266 The tent caterpillars (genus *Malacosoma*) are shelter building, cooperatively-foraging moths that  
267 damage both coniferous and deciduous trees across at least 10 families. Most species use >1 host

268 tree genus, though some (e.g., *Malacosoma constrictum*; *Malacosoma tigris*) are more  
269 specialized (Fitzgerald, 1995). There are six North American species of *Malacosoma*, some with  
270 overlapping geographic distributions (Fitzgerald, 1995). Female moths lay eggs in a mass  
271 wrapped around a branch of the host tree. Larvae of most species (*M. disstria* is an exception)  
272 live colonially inside “tents” made of spun silk and make regular excursions to feed on host  
273 leaves. The caterpillar stage is eaten by birds, mammals and several insect predators, but the  
274 most taxonomically diverse natural enemies are the parasitoids (Fitzgerald, 1995). Of these,  
275 approximately one third are Dipteran (family Tachinidae), while the remaining two thirds are  
276 Hymenopteran parasitoids. Parasitoids attack all immature life stages, but most appear to emerge  
277 during the pre-pupal or pupal stage. Parasitoids of the North American tent caterpillars have been  
278 well documented, and often in the context of other available forest caterpillar hosts, such that it is  
279 reasonable to assert that some parasitoid species are *Malacosoma*-specific (e.g., Langston, 1957;  
280 Stacey, Roe & Williams, 1975; Shaw, 2006).

281 All six of the North American *Malacosoma* species have at least one known parasitoid  
282 association, and we compiled a total of 78 different parasitoid species across all hosts  
283 (**Supplemental Table 2**). Of these, eleven had only been reared from *Malacosoma*. Five of these  
284 eleven species we assigned to the “possible genus-specialists” category, as they had not been  
285 assigned a specific name (which makes it hard to determine whether other hosts exist), or  
286 because they had only been reared a single time from the host. The remaining six “genus-  
287 specialists,” were from four different hymenopteran families. The genus-specialist P:H ratio for  
288 *Malacosoma* is therefore between 1.00 and 1.83.



289 *Malacosoma* have many more “generalists” than *Rhagoletis*: 68 species have been reared from  
290 both *Malacosoma* and at least one other extra-genetic host (**Supplementary Table 2**). Many of  
291 these appear to be specific to Lepidopteran hosts.

292 **System 3: *Dendroctonus* (Coleoptera: Curculionidae).**

293 Approximately 14 species of *Dendroctonus* bark beetles are found in North America (Six &  
294 Bracewell, 2015). *Dendroctonus* are specific to conifers in family Pinaceae, and can be highly  
295 destructive to their host trees. Female beetles construct nuptial chambers in trees where they  
296 mate with males and then deposit eggs in tunnels in the phloem. Larvae feed on phloem and  
297 outer bark and leave the tree only after pupation and adult emergence (Six & Bracewell, 2015).  
298 Most species are tree genus- or species-specific.

299 Parasitoids have been described for eight of the 14 North American *Dendroctonus* species,  
300 though for two of these (*D. adjunctus* and *D. murrjanae*) only one or two parasitoid species are  
301 known. The total list of *Dendroctonus*-associated parasitoids is long, but the records are also  
302 often problematic, as *Dendroctonus* share their habitat with several other genera of bark beetles,  
303 which may or may not be attacked by the same parasitoids. In many studies, parasitoids are listed  
304 as “associates” of either *Dendroctonus*, or of one of the other species, or of both, but this does  
305 not always necessarily mean that a parasitoid attacks that beetle (Overgaard, 1968; Langor, 1991;  
306 Berisford, 2011). We have here again tried to be conservative, though in one case (*Meterorus*  
307 *hypophloeii*) we have ignored a claim of “association” with *Ips* beetles (Kulhavy et al., 1989) as it  
308 did not seem to be well justified and other authors describe *M. hypophloeii* as a *Dendroctonus*  
309 *frontalis* specialist (Stein & Coster, 1977; Berisford, 2011). In total, we found nine  
310 *Dendroctonus* genus-specialists, two possible genus-specialists, and 48 “generalists”

311 **(Supplemental Table 3)**. The genus-specific P:H ratio for *Dendroctonus* is therefore between  
312 1.13 and 1.38.

#### 313 **System 4: *Neodiprion* (Hymenoptera: Diprionidae)**

314 *Neodiprion* is a Holarctic genus of pine-feeding sawflies specializing on conifers in the family  
315 Pinaceae (Smith, 1993). These sawflies have close, life-long associations with their tree hosts.  
316 The short-lived, non-feeding adults mate on the host plant shortly after eclosion, after which the  
317 females deposit their eggs into pockets cut within the host needles. The larvae hatch and feed  
318 externally on the host needles throughout development, and then spin cocoons on or directly  
319 beneath the host (Coppel & Benjamin, 1965; Knerer & Atwood, 1973; Knerer, 1993). Many  
320 species also have highly specialized feeding habits, and feed on a single or small handful of host-  
321 plant species in the genus *Pinus*. Since many of the ~33 *Neodiprion* species native to North  
322 America are considered economic pests (Arnett, 1993), considerable effort has gone into  
323 describing their natural history and exploring potential methods to control *Neodiprion* outbreaks.  
324 Despite the wealth of natural history information, compiling a list of parasitoids attacking  
325 *Neodiprion* is complicated by a history of accidental and intentional introductions. In addition to  
326 the native species, the European pine sawfly, *Neodiprion sertifer*, and three species from the  
327 closely related genera *Diprion* and *Gilpinia* were introduced in the past ~150 years and have  
328 spread across the United States and Canada (Britton, 1915; Gray, 1938; Balch, 1939; Schaffner  
329 Jr., 1939). In an attempt to control these invasive pests, several parasitoids have been introduced,  
330 and now attack both native and invasive diprionids (Finlayson & Reeks, 1936; Finlayson, 1963;  
331 MacQuarrie et al., 2016).

332 We found 20 genus-specialist parasitoid species associated with the 21 species of North  
333 American *Neodiprion* for which parasitoid records exist. An additional seven parasitoids were  
334 classified as “possible” genus-specialists. The genus-specific P:H ratio for *Neodiprion* is  
335 therefore between 0.95 and 1.29. An additional 51 species had been reared from both *Neodiprion*  
336 and an extra-generic host, with nine introduced parasitoids. We also compiled a list of 14  
337 introduced parasitoids, nine hyperparasitoids, and 28 tachinid (Diptera) parasitoids of *Neodiprion*  
338 (**Supplemental Table 4**), but these were not included in any analyses.

339

## 340 **Synthesis**

341 Upon considering our model together with actual estimates of P:H ratios from natural host  
342 systems (**Table 1**), there appear to be few conditions under which the Hymenoptera would not be  
343 the largest order of insects. If, for instance, the P:H ratios for *Rhagoletis*, *Malacosoma*,  
344 *Dendroctonus*, and *Neodiprion* are at all representative of other hosts in those respective orders,  
345 and we use them to calculate relative species richness based on recent counts of only the  
346 *described* species in each order (Adler & Footitt, 2009), the Hymenoptera exceed the Coleoptera  
347 by 2.5-3.2 times (**Table 2**). Recall that these calculations ignore all hyperparasitoids, and also  
348 omit parasitoids of other insect orders (e.g., Hemiptera, Orthoptera) and of non-insect  
349 arthropods. Even if we use half of the lowest P:H ratio estimate for each of the four largest  
350 orders, the Hymenoptera would outnumber the Coleoptera by more than 1.3 times.

351 Note that P:H ratios might be measured more accurately and / or calculated in different ways,  
352 most of which we would expect to increase the estimates of P:H reported here. For instance,  
353 rather than ignoring all of the so-called “generalist” parasitoids, one could identify those for

354 which host ranges are known (e.g., **Figure 4**), divide each by the total number of host genera  
355 attacked, and add that fraction to the numerator of the P:H ratio for the focal host genus. As one  
356 example, the “generalist” parasitoids *Phygadeuon epochrae* and *Coptera evansi* both attack only  
357 *Rhagoletis* flies and the currant fly *Epochra canadensis*. These would each add an additional 0.5  
358 to the other 24 “genus-specialist” parasitoids of *Rhagoletis*, giving a revised P:H of 1.56. For  
359 *Malacosoma*, *Dendroctonus*, and *Neodiprion*, which all have many “generalist” parasitoids with  
360 host ranges that include only a few other extra-generic hosts in the same respective family, such  
361 additions should increase P:H ratio estimates by a considerable margin.

362 Another way to calculate P:H would be to focus not on a host genus but on hosts sharing the  
363 same habitat. For instance, *Dendroctonus* bark beetles share their habitat niche with several other  
364 species of beetle, and many of their parasitoids are “specialists” in the sense that they attack  
365 more than one bark beetle, but all within the same tree habitat (Berisford, 2011). One could,  
366 therefore, calculate a P:H where H is the number of potential beetle host species in the habitat,  
367 and P is the number of “habitat-specialist” parasitoid species (those that attack one or more of the  
368 hosts in that habitat and no other hosts in other habitats).

369 Our analyses largely ignore the increasingly common finding that many apparently polyphagous  
370 insects – both herbivores and parasitoids – show evidence of additional host-associated genetic  
371 structure that might, if considered here as distinct lineages, change P:H ratios (e.g., Drès &  
372 Mallet, 2002; Stireman et al., 2006; Smith et al., 2008; Condon et al., 2014; Forbes et al., 2017).

373 Indeed, all four of our focal host genera have named subspecies or show evidence for host-  
374 associated, reproductively-isolated lineages (Stehr & Cook, 1968; Powell et al., 2014; Six &  
375 Bracewell, 2015; Bagley et al., 2017). Though we chose to “lump” subspecies and other  
376 reproductively isolated lineages together for this analysis, it is interesting to consider how a

377 detailed study of genetic diversity and reproductive isolation among a host genus and all of its  
378 associated parasitoids might change P:H ratios. Studies of the flies in the *Rhagoletis pomonella*  
379 species complex and three of their associated parasitoids suggest that where additional host-  
380 associated lineages are found in a phytophagous insect, this cryptic diversity may be multiplied  
381 many times over in its specialist parasitoid community (Forbes et al., 2009; Hood et al., 2015). If  
382 broadly true, this implies that genus-specific P:H ratios may often be much higher than we report  
383 here.

384 One sensible criticism will surely be: to what extent are the P:H ratios for these four genera  
385 reflective of global P:H ratios for their respective orders (Coleoptera, Lepidoptera, Diptera, and  
386 the non-parasitoid Hymenoptera)? Surely some insect genera escape parasitism, and perhaps the  
387 examples chosen here simply have exceptionally large, or unusually specialized, parasitoid  
388 communities. As to the former, it may be that such escape artists exist, but they also may be  
389 relatively rare. After all, there are parasitoids that attack aquatic insects (Juliano, 1981; Elliott,  
390 1982), that parasitize insects in Arctic communities (e.g., Fernandez-Triana et al., 2011), and  
391 even those that dig down into soils to unearth and oviposit into pupae (Muesebeck, 1980). The  
392 list of potential hosts for parasitoids also extends to many non-insect arthropods, including  
393 spiders, mites, and nematodes (Lasalle, 1994; Finch, 2005). As to the four example genera being  
394 representative of overly large parasitoid communities, all of their “overall” P:H numbers (**Table**  
395 **1**) are actually below the means found for their respective orders in an extensive study of  
396 parasitoid communities in Britain (Hawkins & Lawton, 1987), suggesting that these communities  
397 are of average, or slightly below-average, size.

398

399 **Concluding Thoughts**

400 While it may indeed be premature to claim that the Hymenoptera is the largest order of insects  
401 based solely on what we present here, other studies offer support for the same conclusion. In  
402 fact, the preponderance of evidence suggests that the common wisdom about the Coleoptera  
403 being the most speciose is the more dubious claim. Studies of insect diversity that reduce  
404 taxonomic biases have found the Hymenoptera to be the most species-rich in both temperate  
405 (Gaston, 1991) and tropical (Stork, 1991) forests, as well as in other habits (e.g., Kimsey et al.,  
406 2017). In addition, a mass-barcoding study of Canadian insects found both Hymenoptera and  
407 Diptera more diverse than Coleoptera (Hebert et al., 2016). Moreover, other historically-accepted  
408 ideas about diversity of parasitoid hymenopterans have recently been questioned, including the  
409 apparent myth that parasitoids are one of only a few groups whose diversity decreases towards  
410 the tropics (Veijalainen et al., 2012; Eagalle & Smith, 2017). In any case, we hope this  
411 commentary results in a redoubled effort to understand and describe natural histories of  
412 parasitoid wasps, including host ranges and cryptic host-associated diversity, such that estimates  
413 of P:H can be made for additional host genera. We also hope to see similar efforts in other  
414 animal groups that may harbor great diversity but for which far too little is known about host  
415 ranges, such as particularly speciose orders of mites and nematodes (e.g., Grucmanová &  
416 Holuša, 2013; Walter & Proctor, 2013). In other words, and to again quote Erwin (1982), we  
417 hope that “...someone will challenge these figures with more data.”

418

#### 419 **Competing Interests**

420 We have no competing interests.

421

422 **Authors' Contributions**

423 AAF conceived of the study. All authors helped formulate a framework for addressing the  
424 questions in the paper, developed the logical model, and collected and analyzed data from the  
425 four host genera. AAF and RKB wrote the manuscript. All authors gave final approval for  
426 publication.

427

428 **Acknowledgements**

429 We thank Isaac Winkler, Anna Ward, Eric Tvedte, Miles Zhang, Glen Hood, and Matt Yoder for  
430 their thoughtful discussions and comments on this manuscript.

431

432 **Funding**

433 Projects funded by the National Science Foundation to AAF (DEB 1145355 and 1542269) led  
434 directly to the discussions that motivated this study.

435 **References**

- 436 Adler PH., Foottit R. 2009. Introduction. In: Foottit R, Adler P eds. *Insect Diversity: Science and*  
437 *Society*. Oxford: Wiley-Blackwell, 1–6. DOI: 10.1002/9781444308211.ch1.
- 438 Arnett RH. 1993. *American Insects: A Handbook of the Insects of America North of Mexico*.  
439 Gainesville, FL: Sandhill Crane Press.
- 440 Austin AD., Downton M. 2000. *Hymenoptera: Evolution, Biodiversity, and Biological Control*.  
441 Clayton, Australia: CSIRO Publishing.
- 442 Bagley RK., Sousa VC., Niemiller ML., Linnen CR. 2017. History, geography and host use  
443 shape genomewide patterns of genetic variation in the redheaded pine sawfly (*Neodiprion*  
444 *lecontei*). *Molecular Ecology* 26:1022–1044. DOI: 10.1111/mec.13972.
- 445 Balch R. 1939. The outbreak of the European spruce sawfly in Canada and some important  
446 features of its bionomics. *Journal of Economic Entomology* 32:412–418.
- 447 Basset Y., Cizek L., Cuénoud P., Didham RK., Guilhaumon F., Missa O., Novotny V., Ødegaard  
448 F., Roslin T., Schmidl J., Tishechkin AK., Winchester NN., Roubik DW., Aberlenc HP.,  
449 Bail J., Barrios H., Bridle JR., Castaño-Meneses G., Corbara B., Curletti G., Da Rocha  
450 WD., De Bakker D., Delabie JHC., Dejean A., Fagan LL., Floren A., Kitching RL.,  
451 Medianero E., Miller SE., De Oliveira EG., Orivel J., Pollet M., Rapp M., Ribeiro SP.,  
452 Roisin Y., Schmidt JB., Sørensen L., Leponce M. 2012. Arthropod diversity in a tropical  
453 forest. *Science* 338:1481–1484. DOI: 10.1126/science.1226727.
- 454 Berisford CW. 2011. Parasitoids of the southern pine beetle. In: Coulson R, Klepzig K eds.  
455 *Southern Pine Beetle II*. General Technical Report SRS-140. Asheville, NC: United States



- 456 Department of Agriculture Forest Service, Southern Research Station, 129–139.
- 457 Bouchard P., Grebennikov V V., Smith ABT., Douglas H. 2009. Biodiversity of Coleoptera. In:  
458 Foottit RG, Adler PH eds. *Insect Biodiversity: Science and Society*. Oxford: Wiley-  
459 Blackwell, 265–301. DOI: 10.1002/9781444308211.ch11.
- 460 Britton W. 1915. A destructive pine sawfly introduced from Europe, *Diprion (Lophyrus) simile*  
461 Hartig. *Journal of Economic Entomology* 8:379–382.
- 462 Browne J. 1996. *Charles Darwin: Voyaging*. Princeton, NJ: Princeton University Press.
- 463 Bush GL. 1966. The taxonomy, cytology, and evolution of the genus *Rhagoletis* in North  
464 America (Diptera, Tephritidae). *Bulletin of the Museum of Comparative Zoology* 134:431–  
465 562. DOI: 10.1136/bmj.2.6182.87.
- 466 Cameron P., Morrison F. 1974. *Psilus sp.* (Hymenoptera: Diapriidae), a parasite of the pupal  
467 stage of the apple maggot, *Rhagoletis pomonella* (Diptera: Tephritidae) in south-western  
468 Quebec. *Phytoprotection* 55:13–16.
- 469 Condon MA., Scheffer SJ., Lewis ML., Wharton R., Adams DC., Forbes AA. 2014. Lethal  
470 interactions between parasites and prey increase niche diversity in a tropical community.  
471 *Science* 343:1240–1244. DOI: 10.1126/science.1245007.
- 472 Coppel HC., Benjamin DM. 1965. Bionomics of the Nearctic pine-feeding Diprionids. *Annual*  
473 *Review of Entomology* 10:69–96. DOI: 10.1146/annurev.en.10.010165.000441.
- 474 Drès M., Mallet J. 2002. Host races in plant-feeding insects and their importance in sympatric  
475 speciation. *Philosophical Transactions of the Royal Society B: Biological Sciences*  
476 357:471–492. DOI: 10.1098/rstb.2002.1059.

- 477 Eagalle T., Smith MA. 2017. Diversity of parasitoid and parasitic wasps across a latitudinal  
478 gradient: Using public DNA records to work within a taxonomic impediment. *FACETS*  
479 2:937–954. DOI: 10.1139/facets-2016-0061.
- 480 Elliott JM. 1982. The life cycle and spatial distribution of the aquatic parasitoid *Agriotypus*  
481 *armatus* (Hymenoptera: Agriotypidae) and its caddis host *Silo pallipes* (Trichoptera:  
482 Goeridae). *The Journal of Animal Ecology* 51:923–941. DOI: 10.2307/4014.
- 483 Erwin TL. 1982. Tropical forests: Their richness in Coleoptera and other arthropod species. *The*  
484 *Coleopterists Bulletin* 36:74–75. DOI: 10.2307/4007977.
- 485 Farrell BD. 1998. “Inordinate fondness” explained: Why are there so many beetles? *Science*  
486 281:555–559. DOI: 10.1126/science.281.5376.555.
- 487 Feder JL. 1995. The effects of parasitoids on sympatric host races of *Rhagoletis pomonella*  
488 (Diptera: Tephritidae). *Ecology* 76:801–813. DOI: 10.2307/1939346.
- 489 Fernandez-Triana J., Smith MA., Boudreault C., Goulet H., Hebert PDN., Smith AC., Roughley  
490 R. 2011. A poorly known high-latitude parasitoid wasp community: Unexpected diversity  
491 and dramatic changes through time. *PLoS ONE* 6:e23719. DOI:  
492 10.1371/journal.pone.0023719.
- 493 Finch OD. 2005. The parasitoid complex and parasitoid-induced mortality of spiders (Araneae)  
494 in a Central European woodland. *Journal of Natural History* 39:2339–2354. DOI:  
495 10.1080/00222930502005720.
- 496 Finlayson T. 1963. Taxonomy of cocoons and puparia, and their contents, of Canadian parasites  
497 of some native Diprionidae (Hymenoptera). *The Canadian Entomologist* 95:475–507. DOI:

- 498 10.4039/Ent95475-5.
- 499 Finlayson LR., Reeks WA. 1936. Notes on the introduction of *Diprion* parasites to Canada. *The*  
500 *Canadian Entomologist* 68:160–166. DOI: 10.4039/Ent68160-7.
- 501 Fitzgerald TD. 1995. *The Tent Caterpillars*. Ithaca, NY: Cornell University Press.
- 502 Forbes AA., Devine SN., Hippee AC., Tvedte ES., Ward AKG., Widmayer HA., Wilson CJ.  
503 2017. Revisiting the particular role of host shifts in initiating insect speciation. *Evolution*  
504 71:1126–1137. DOI: 10.1111/evo.13164.
- 505 Forbes AA., Hood GR., Feder JL. 2010. Geographic and ecological overlap of parasitoid wasps  
506 associated with the *Rhagoletis pomonella* (Diptera: Tephritidae) species complex. *Annals of*  
507 *the Entomological Society of America* 103:908–915. DOI: 10.1603/AN10046.
- 508 Forbes AA., Powell THQ., Stelinski LL., Smith JJ., Feder JL. 2009. Sequential sympatric  
509 speciation across tropic levels. *Science* 323:776–779. DOI: 10.1126/science.1166981.
- 510 Forbes AA., Satar S., Hamerlinck G., Nelson AE., Smith JJ. 2012. DNA barcodes and targeted  
511 sampling methods identify a new species and cryptic patterns of host specialization among  
512 North American *Coptera* (Hymenoptera: Diapriidae). *Annals of the Entomological Society*  
513 *of America* 105:608–612. DOI: 10.1603/AN12012.
- 514 Gaston KJ. 1991. The magnitude of global insect species richness. *Conservation Biology* 5:283–  
515 296. DOI: 10.2307/2385898.
- 516 Gaston KJ. 1993. Spatial patterns in the description and richness of the Hymenoptera. In: LaSalle  
517 J, Gauld ID eds. *Hymenoptera and Biodiversity*. Wallingford, UK: CAB International, 277–  
518 293.

- 519 Gibson GAP., Huber JT., Woolley JB. 1997. *Annotated Keys to the Genera of Nearctic*  
520 *Chalcidoidea (Hymenoptera)*. Ottawa: NRC Research Press. DOI:  
521 <https://doi.org/10.1139/9780660166698>.
- 522 Gould S. 1993. A special fondness for beetles. *Natural History* 102:4–8.
- 523 Gray D. 1938. Notes on the occurrence of *Diprion frutetorum* Fabr. in southern Ontario. *Annual*  
524 *Report of the Entomological Society of Ontario* 68:50–51.
- 525 Grucmanová Š., Holuša J. 2013. Nematodes associated with bark beetles, with focus on the  
526 genus *Ips* (Coleoptera: Scolytinae) in Central Europe. *Acta Zoologica Bulgarica* 65:547–  
527 556.
- 528 Haldane J. 1949. *What is Life? The Layman's View of Nature*. London: Lindsay Drummond.
- 529 Hamilton AJ., Novotný V., Waters EK., Basset Y., Benke KK., Grimbacher PS., Miller SE.,  
530 Samuelson GA., Weiblen GD., Yen JDL., Stork NE. 2013. Estimating global arthropod  
531 species richness: Refining probabilistic models using probability bounds analysis.  
532 *Oecologia* 171:357–365. DOI: 10.1007/s00442-012-2434-5.
- 533 Hawkins BA., Lawton JH. 1987. Species richness for parasitoids of British phytophagous  
534 insects. *Nature* 326:788–790. DOI: 10.1038/326788a0.
- 535 Hebert PDN., Ratnasingham S., Zakharov E V., Telfer AC., Levesque-Beaudin V., Milton MA.,  
536 Pedersen S., Jannetta P., DeWaard JR. 2016. Counting animal species with DNA barcodes:  
537 Canadian insects. *Philosophical Transactions of the Royal Society B: Biological Sciences*  
538 371:20150333. DOI: 10.1098/rstb.2015.0333.
- 539 Hood GR., Forbes AA., Powell THQ., Egan SP., Hamerlinck G., Smith JJ., Feder JL. 2015.

- 540 Sequential divergence and the multiplicative origin of community diversity. *Proceedings of*  
541 *the National Academy of Sciences* 112:E5980–E5989. DOI: 10.1073/pnas.1424717112.
- 542 Huber JT. 2009. Biodiversity of Hymenoptera. In: Foottit RG, Adler PH eds. *Insect Biodiversity:*  
543 *Science and Society*. Oxford: Wiley-Blackwell, 303–323. DOI:  
544 10.1002/9781444308211.ch12.
- 545 Hunt T., Bergsten J., Levkanicova Z., Papadopoulou A., John O St., Wild R., Hammond PM.,  
546 Ahrens D., Balke M., Caterino MS., Gomez-Zurita J., Ribera I., Barraclough TG.,  
547 Bocakova M., Bocak L., Vogler AP. 2007. A comprehensive phylogeny of beetles reveals  
548 the evolutionary origins of a superradiation. *Science* 318:1913–1916. DOI:  
549 10.1126/science.1146954.
- 550 Hutchinson GE. 1959. Homage to Santa Rosalia or why are there so many kinds of animals? *The*  
551 *American Naturalist* 93:145–159. DOI: 10.1086/282070.
- 552 Juliano SA. 1981. *Trichogramma* spp. (Hymenoptera: Trichogrammatidae) as egg parasitoids of  
553 *Sepedon fuscipennis* (Diptera: Sciomyzidae) and other aquatic Diptera. *The Canadian*  
554 *Entomologist* 113:271–279. DOI: 10.4039/Ent113271-4.
- 555 Kimsey L., Zavortink T., Kimsey R., Heydon S. 2017. Insect biodiversity of the Algodones  
556 Dunes of California. *Biodiversity Data Journal* 5:e21715. DOI: 10.3897/BDJ.5.e21715.
- 557 Kirby W., Spence W. 1818. *An Introduction to Entomology*. London: Longman, Hurt, Rees,  
558 Orme, and Brown.
- 559 Knerer G. 1993. Life history diversity in sawflies. In: Wagner MR, Raffa KF eds. *Sawfly Life*  
560 *History Adaptations to Woody Plants*. San Diego: Academic Press, 33–60.

- 561 Knerer G., Atwood CE. 1973. Diprionid sawflies: Polymorphism and speciation. *Science*  
562 179:1090–1099.
- 563 Krombein K., Hurd P., Smith D., Burks B. 1979. *Catalog of Hymenoptera in America North of*  
564 *Mexico*. Washington, D.C.: Smithsonian Institution Press.
- 565 Kulhavy D., Goyer RA., Bing JW., Riley M. 1989. *Ipps* spp. natural enemy relationships in the  
566 Gulf Coastal states. *Stephen F. Austin State University Faculty Publications Paper 300*:157–  
567 167.
- 568 Langor DW. 1991. Arthropods and nematodes co-occurring with the eastern larch beetle,  
569 *Dendroctonus simplex* [Col.: Scolytidae], in Newfoundland. *Entomophaga* 36:303–313.  
570 DOI: 10.1007/BF02374566.
- 571 Langston RL. 1957. A synopsis of hymenopterous parasites of *Malacosoma* in California  
572 (Lepidoptera, Lasiocampidae). *University of California Publications in Entomology* 14:1–  
573 50.
- 574 Lasalle J. 1994. North American genera of Tetrastichinae (Hymenoptera: Eulophidae). *Journal*  
575 *of Natural History* 28:109–236. DOI: 10.1080/00222939400770091.
- 576 LaSalle J. 1993. Parasitic Hymenoptera, biological control and biodiversity. In: LaSalle J, Gauld  
577 ID eds. *Hymenoptera and Biodiversity*. Wallingford, UK: CAB International, 197–215.
- 578 LaSalle J., Gauld ID. 1993. Hymenoptera: their diversity, and their impact on the diversity of  
579 other organisms. In: *Hymenoptera and Biodiversity*. Wallingford, UK: CAB International,  
580 1–26.
- 581 Lathrop F., Newton R. 1933. The biology of *Opus melleus* Gahan, a parasite of the blueberry

- 582 maggot. *Journal of Agricultural Research* 46:143–160.
- 583 MacQuarrie CJK., Lyons DB., Lukas Seehausen M., Smith SM. 2016. A history of biological  
584 control in Canadian forests, 1882-2014. *Canadian Entomologist* 148:S239–S269. DOI:  
585 10.4039/tce.2015.66.
- 586 McKenna D., Farrell BD. 2009. Beetles (Coleoptera). In: Hedges S, Kumar S eds. *The Timetree*  
587 *of Life*. Oxford: Oxford University Press, 278–289.
- 588 Memmott J., Godfray HCJ. 1993. Parasitoid webs. In: Lasalle J, Gauld ID eds. *Hymenoptera and*  
589 *Biodiversity*. Wallingford, UK: CAB International, 217–234.
- 590 Muesebeck C. 1980. *The Nearctic parasitic wasps of the genera Psilus Panzer and Coptera Say*  
591 *(Hymenoptera, Proctotrupoidea, Diapriidae)*. Technical Bulletin 1617. Washington, D.C.:  
592 United States Department of Agriculture Science and Education Administration.
- 593 Novotny V., Basset Y., Miller SE., Weiblen GD., Bremer B., Cizek L., Drozd P. 2002. Low host  
594 specificity of herbivorous insects in a tropical forest. *Nature* 416:841–844. DOI:  
595 10.1038/416841a.
- 596 Noyes J. 2017. Universal Chalcidoidea Database. Available at <http://www.nhm.ac.uk/chalcidooids>
- 597 Ødegaard F. 2000. How many species of arthropods? Erwin’s estimate revised. *Biological*  
598 *Journal of the Linnean Society* 71:583–597. DOI: 10.1111/j.1095-8312.2000.tb01279.x.
- 599 Overgaard N. 1968. Insects associated with southern pine beetle in Texas, Louisiana, and  
600 Mississippi. *Journal of Economic Entomology* 61:1197–1201.
- 601 Peck O. 1963. A catalogue of the Nearctic Chalcidoidea (Insecta: Hymenoptera). *Memoirs of the*  
602 *Entomological Society of Canada* 95:5–1092. DOI: 10.4039/entm9530fv.

- 603 Pietsch TW., Bogatov V V., Amaoka K., Zhuravlev YN., Barkalov VY., Gage S., Takahashi H.,  
604 Lelej AS., Storozhenko SY., Minakawa N., Bennett DJ., Anderson TR., Ôhara M.,  
605 Prozorova LA., Kuwahara Y., Kholin SK., Yabe M., Stevenson DE., MacDonald EL. 2003.  
606 Biodiversity and biogeography of the islands of the Kuril Archipelago. *Journal of*  
607 *Biogeography* 30:1297–1310. DOI: 10.1046/j.1365-2699.2003.00956.x.
- 608 Powell THQ., Forbes AA., Hood GR., Feder JL. 2014. Ecological adaptation and reproductive  
609 isolation in sympatry: Genetic and phenotypic evidence for native host races of *Rhagoletis*  
610 *pomonella*. *Molecular Ecology* 23:688–704. DOI: 10.1111/mec.12635.
- 611 Rice ME. 2015. Terry L. Erwin: She had a black eye and in her arm she held a skunk. *ZooKeys*  
612 500:9–24. DOI: 10.3897/zookeys.500.9772.
- 613 Rull J., Wharton R., Feder JL., Guillén L., Sivinski J., Forbes A., Aluja M. 2009. Latitudinal  
614 variation in parasitoid guild composition and parasitism rates of North American hawthorn  
615 infesting *Rhagoletis*. *Environmental Entomology* 38:588–599. DOI: 10.1603/022.038.0310.
- 616 Schaffner Jr. J V. 1939. *Neodiprion sertifer* (Geoff.), a pine sawfly accidentally introduced into  
617 New Jersey from Europe. *Journal of Economic Entomology* 32:887–888.
- 618 Schoenly K. 1990. The predators of insects. *Ecological Entomology* 15:333–345. DOI:  
619 10.1111/j.1365-2311.1990.tb00815.x.
- 620 Shaw S. 2006. *Aleiodes wasps of eastern forests: A guide to parasitoids and associated*  
621 *mummified caterpillars*. FHTET-2006-08. Washington, D.C.: United States Department of  
622 Agriculture Forest Service, Forest Health Technology Enterprise Team.
- 623 Sheppard CA. 2004. Benjamin Dann Walsh: Pioneer entomologist and proponent of Darwinian



- 624 theory. *Annual Review of Entomology* 49:1–25. DOI:  
625 10.1146/annurev.ento.49.061802.123145.
- 626 Six DL., Bracewell R. 2015. *Dendroctonus*. In: Vega FE, Hofstetter RW eds. *Bark Beetles:*  
627 *Biology and Ecology of Native and Invasive Species*. Oxford: Academic Press, 305–350.  
628 DOI: 10.1016/B978-0-12-417156-5.00008-3.
- 629 Smith DR. 1993. Systematics, Life History, and Distribution of Sawflies. In: *Sawfly Life History*  
630 *Adaptations to Woody Plants*. San Diego: Academic Press, 3–32.
- 631 Smith MA., Rodriguez JJ., Whitfield JB., Deans AR., Janzen DH., Hallwachs W., Hebert PDN.  
632 2008. Extreme diversity of tropical parasitoid wasps exposed by iterative integration of  
633 natural history, DNA barcoding, morphology, and collections. *Proceedings of the National*  
634 *Academy of Sciences* 105:12359–12364. DOI: 10.1073/pnas.0805319105.
- 635 Stacey L., Roe R., Williams K. 1975. Mortality of eggs and pharate larvae of the eastern tent  
636 caterpillar, *Malacosoma americana* (F.) (Lepidoptera: Lasiocampidae). *Journal of the*  
637 *Kansas Entomological Society* 48:521–523.
- 638 Stehr FW., Cook EF. 1968. *A revision of the genus Malacosoma Hübner in North America*  
639 *(Lepidoptera: Lasiocampidae): Systematics, biology, immatures, and parasites*. United  
640 States National Museum Bulletin 276. Washington, D.C.: Smithsonian Institution Press.  
641 DOI: 10.5479/si.03629236.276.1.
- 642 Stein CR., Coster JE. 1977. Distribution of some predators and parasites of southern pine beetle  
643 in two species of pine. *Environmental Entomology* 6:689–694. DOI: 10.1093/ee/6.5.689.
- 644 Stireman JO., Nason JD., Heard SB., Seehawer JM. 2006. Cascading host-associated genetic

- 645 differentiation in parasitoids of phytophagous insects. *Proceedings of the Royal Society B:*  
646 *Biological Sciences* 273:523–530. DOI: 10.1098/rspb.2005.3363.
- 647 Stork NE. 1991. The composition of the arthropod fauna of Bornean lowland rain forest trees.  
648 *Journal of Tropical Ecology* 7:161–180. DOI: 10.1017/S0266467400005319.
- 649 Stork NE., McBroom J., Gely C., Hamilton AJ. 2015. New approaches narrow global species  
650 estimates for beetles, insects, and terrestrial arthropods. *Proceedings of the National*  
651 *Academy of Sciences of the United States of America* 112:7519–7523. DOI:  
652 10.1073/pnas.1502408112.
- 653 Veijalainen A., Wahlberg N., Broad GR., Erwin TL., Longino JT., Saaksjarvi IE. 2012.  
654 Unprecedented ichneumonid parasitoid wasp diversity in tropical forests. *Proceedings of*  
655 *the Royal Society B: Biological Sciences* 279:4694–4698. DOI: 10.1098/rspb.2012.1664.
- 656 Walter DE., Proctor HC. 2013. *Mites: Ecology, Evolution & Behaviour: Life at a Microscale.*  
657 Dordrecht, Netherlands: Springer Netherlands. DOI: 10.1007/978-94-007-7164-2.
- 658 Westwood JO. 1833. On the probable number of species of insects in the Creation; together with  
659 descriptions of several minute Hymenoptera. *The Magazine of Natural History & Journal of*  
660 *Zoology, Botany, Mineralogy, Geology, and Meteorology* 6:116–123.
- 661 Wharton RA., Marsh PM. 1978. New World Opiinae (Hymenoptera: Braconidae) parasitic on  
662 Tephritidae (Diptera). *Journal of the Washington Academy of Sciences* 68:147–167.
- 663 Wharton R., Marsh P., Sharkey M. 1997. Manual of the New World genera of the family  
664 Braconidae (Hymenoptera). *Special Publication of the International Society of*  
665 *Hymenopterists* 1:1–439.

- 666 Wharton R., Yoder M. 2017. Parasitoids of fruit-infesting Tephritidae. *Available at*  
667 *<http://paroffit.org>*
- 668 Wiens JJ., Lapoint RT., Whiteman NK. 2015. Herbivory increases diversification across insect  
669 clades. *Nature Communications* 6:8370. DOI: 10.1038/ncomms9370.
- 670 Zhang ZQ. 2011. Animal biodiversity: An introduction to higher-level classification and  
671 taxonomic richness. *Zootaxa* 12:7–12.
- 672 Zhang S-Q., Che L-H., Li Y., Dan Liang., Pang H., Ślipiński A., Zhang P. 2018. Evolutionary  
673 history of Coleoptera revealed by extensive sampling of genes and species. *Nature*  
674 *Communications* 9:205. DOI: 10.1038/s41467-017-02644-4.
- 675
- 676
- 677

678 **Table 1. Summary of estimates of parasitoid to host (P:H) ratios for four host insect**  
 679 **genera.** Shown for each host genus are: the total number of North American (NA<sub>m</sub>) species, as  
 680 well as the number with parasitoid records; the overall P:H, which includes generalist species;  
 681 the genus-specialist P:H; and the genus-specialist P:H when “possible genus-specialists” were  
 682 included. Parasitoid families that were among each group of genus-specialists are also listed.  
 683

| Focal Host<br>Genus                                   | # NA <sub>m</sub><br>Species<br>(# with<br>parasitoid<br>records) | P:H (overall) | P:H                                    |                                                                  | Genus-specialist<br>families                                   |
|-------------------------------------------------------|-------------------------------------------------------------------|---------------|----------------------------------------|------------------------------------------------------------------|----------------------------------------------------------------|
|                                                       |                                                                   |               | P:H<br>(genus-<br>specialists<br>only) | (specialist)<br>[including<br>possible<br>genus-<br>specialists] |                                                                |
| <i>Rhagoletis</i><br>(Diptera:<br>Tephritidae)        | 24 (16)                                                           | 2.44          | 1.31                                   | 1.50                                                             | Braconidae;<br>Diapriidae;<br>Pteromalidae                     |
| <i>Malacosoma</i><br>(Lepidoptera:<br>Lasiocampidae)  | 6 (6)                                                             | 13.00         | 1.00                                   | 1.83                                                             | Braconidae;<br>Eulophidae;<br>Ichneumonidae;<br>Platygastridae |
| <i>Dendroctonus</i><br>(Coleoptera:<br>Curculionidae) | 14 (8)                                                            | 6.50          | 1.13                                   | 1.38                                                             | Braconidae;<br>Ichneumonidae;<br>Gasteruptionidae;             |

|                   |         |      |      |      |                 |
|-------------------|---------|------|------|------|-----------------|
|                   |         |      |      |      | Proctotrupidae; |
|                   |         |      |      |      | Pteromalidae;   |
|                   |         |      |      |      | Platygastridae  |
| <i>Neodiprion</i> |         |      |      |      |                 |
| (Hymenoptera:     | 33 (21) | 3.48 | 0.95 | 1.29 | Ichneumonidae;  |
| Diprionidae)      |         |      |      |      | Chrysididae     |

684

685 **Table 2. Calculations of hymenopteran species richness, given numbers of described insect**  
 686 **species in other orders and P:H ratios estimated in this paper.** Combining conservative P:H  
 687 ratio estimates from four case studies with numbers of described species in the four largest insect  
 688 orders (Adler and Foottit 2009; Huber 2009) offers an idea of how species richness of the  
 689 Hymenoptera may compare with that of other orders. <sup>a</sup>Parasitoids attack hosts in all other insect  
 690 orders, but these are omitted as we did not estimate P:H ratios for any hosts in these orders. Total  
 691 numbers therefore exclude large numbers of hymenopteran species.

|                                                                            | High P:H<br>estimates from<br>case studies | Low P:H estimates<br>from case studies | Half of lowest<br>estimates from<br>case studies |
|----------------------------------------------------------------------------|--------------------------------------------|----------------------------------------|--------------------------------------------------|
| Diptera (152,244)                                                          | 228,366                                    | 199,440                                | 99,720                                           |
| Lepidoptera (156,793)                                                      | 286,931                                    | 156,793                                | 78,397                                           |
| Coleoptera (359,891)                                                       | 494,850                                    | 406,677                                | 203,338                                          |
| Non-parasitoid Hymenoptera<br>(~62,000)                                    | 79,980                                     | 58,900                                 | 29,450                                           |
| All other insect orders (335,970)                                          | 0 <sup>a</sup>                             | 0 <sup>a</sup>                         | 0 <sup>a</sup>                                   |
| <b>TOTAL PARASITOID</b>                                                    | <b>1,107,487</b>                           | <b>833,590</b>                         | <b>416,795</b>                                   |
| <b>HYMENOPTERA</b>                                                         |                                            |                                        |                                                  |
| Non-parasitoid Hymenoptera (to<br>add to calculated parasitoid<br>numbers) | 62,000                                     | 62,000                                 | 62,000                                           |
| <b>TOTAL HYMENOPTERA</b>                                                   | <b>1,152,127</b>                           | <b>883,810</b>                         | <b>472,905</b>                                   |

692

693 **Figure Captions.**

694 **Figure 1.** An illustration of how uncertainty about specialist vs. generalist behaviours might lead  
695 to misleading conclusions about parasitoid species richness. In panel A, each host species  
696 (differently colored beetles) is attacked by two parasitoids. However, because all parasitoids  
697 attack all four beetles the overall species richness of hosts exceeds that of the parasitoids (i.e.,  
698  $P:H < 1$ ). In panel B, while some hosts have only one parasitoid, overall parasitoid richness  
699 exceeds host richness ( $P:H > 1$ ) because some parasitoids are more specialized.

700

701 **Figure 2.** Representations of the space where the number of parasitoid wasp species would  
702 outnumber the Coleoptera, given different parasitoid-to-host ratios for coleopteran hosts and for  
703 other insect hosts. A) Pictorial representation of the model, wherein the total number of  
704 parasitoid species ( $P$ ) will be the sum of the number of species of Coleoptera ( $C$ ) and of other  
705 insects ( $I$ ), each first multiplied by their respective overall parasitoid-to-host ratio ( $p_C$  or  $p_I$ ); B)  
706 Black lines show results of the model for four different values of  $p_I$  and with  $p_C$  held at zero (i.e.,  
707 when the average coleopteran has no specialist parasitoids). Where black lines overlap with gray  
708 shaded areas represents space where  $P > C$ ; C) Results of four different scenarios in which  $p_C$   
709 and  $p_I$  are equal; D) Some additional combinations of  $p_C$  and  $p_I$ . Though both axes could  
710 continue to 1.0, some high values of  $P$  and  $C$  are not mathematically possible or biologically  
711 likely, and at  $P$  or  $C$  values above 0.5 the question about relative species-richness becomes moot.

712

713 **Figure 3.** Plot based on Equation 4, with five representations of moments when  $C$  and  $P$  are  
714 equal proportions (solid black lines).  $p_I$  = overall P:H ratio for non-coleopteran insect hosts;  $p_C$  =

715 overall P:H ratio for the Coleoptera. Space above and to the right of each line represents values  
716 of  $p_C$  and  $p_I$  where  $P > C$ , while space below and to the left of each line represents values where  
717  $C > P$ .

718

719 **Figure 4.** Known genus-specialist parasitoids can be used to calculate a minimum P:H ratio for  
720 an insect host genus. The focal beetle genus H (three species) has four known parasitoids, P1-P4.  
721 P1 and P4 are relatively well-studied, and known to be genus-specialists, attacking only hosts in  
722 this beetle genus. P3 has some known extra-generic hosts, while the host range of P2 is poorly  
723 studied and unknown extra-generic hosts may exist. For the purposes of estimating a genus-  
724 specialist P:H, one would therefore use only P1 and P4, such that a minimum P:H for this beetle  
725 genus would be  $2/3$ , or 0.67. Note that if the total number and identities of extra-generic hosts  
726 were known for P2 and P3, a “true” P:H for the genus could be calculated (see Synthesis, below).

727

728
