1 Quantifying the unquantifiable:  
2 why Hymenoptera – not Coleoptera – is the most speciose animal order

3

4 Andrew A. Forbes, Robin K. Bagley, Marc A. Beer, Alaine C. Hippee, & Heather A. Widmayer

5 University of Iowa, Department of Biology, 434 Biology Building, Iowa City, IA 52242

6

7 Corresponding author:

8 Andrew Forbes

9

10 Email address: [andrew-forbes@uiowa.edu](mailto:andrew-forbes@uiowa.edu)

11

12

13

14 **Abstract**

15 **Background.** We challenge the oft-repeated claim that the beetles (Coleoptera) are the most  
16 species-rich order of animals. Instead, we assert that another order of insects, the Hymenoptera,  
17 are more speciose, due in large part to the massively diverse but relatively poorly known  
18 parasitoid wasps. The idea that the beetles have more species than other orders is primarily based  
19 on their respective collection histories and the relative availability of taxonomic resources, which  
20 both disfavor parasitoid wasps. Though it is unreasonable to directly compare numbers of  
21 described species in each order, the ecology of parasitic wasps – specifically, their intimate  
22 interactions with their hosts – allows for estimation of relative richness. We present a simple  
23 logical model that shows how the specialization of many parasitic wasps on their hosts suggests  
24 few scenarios in which there would be more beetle species than parasitic wasp species. We  
25 couple this model with an accounting of what we call the “genus-specific parasitoid-host ratio”  
26 from four well-studied genera of insect hosts, a metric by which to generate extremely  
27 conservative estimates of the average number of parasitic wasp species attacking a given beetle  
28 or other insect host species. Synthesis of our model with data from real host systems suggests  
29 that the Hymenoptera may have 2.5 - 3.2x more species than the Coleoptera. While there are  
30 more described species of beetles than all other animals, the Hymenoptera are almost certainly  
31 the larger order.

32 **Keywords:** beetles, inordinate fondness; insect diversity; parasitic wasps; parasitoids; species  
33 richness

34

35

36 “...if the micro-hymenopterists would get off their lazy asses  
37 and start describing species, there would be more micro-  
38 Hymenoptera than there are Coleoptera.”

39  
40 – Terry Erwin (in [1])

41  
42 The beetles (order Coleoptera), have historically [2–4] and contemporaneously [5–10] been  
43 described as the most speciose order of animals on Earth. The great diversity of beetles was  
44 sufficiently established by the middle of last century such that J.B.S. Haldane (possibly  
45 apocryphally<sup>1</sup>) quipped that an intelligent creator of life must have had “...an inordinate  
46 fondness for beetles” [11]. However, what evidence underlies the claim that the Coleoptera are  
47 more species-rich than the other insect orders? Certainly, more species of beetles (>350,000)  
48 have been *described* than any other order of animal, insect or otherwise [12], but does this reflect  
49 their actual diversity relative to other insects?

50 Why are beetles thought to be so diverse in the first place? In part, historical biases in beetle  
51 collecting and an associated accumulation of taxonomic resources for the Coleoptera may have  
52 had an outsized influence on our perception of diversity. In the mid-to-late 1800s, beetles were  
53 prized among insects for their collectability. Many landed gentlemen - including, notably,  
54 Charles Darwin - collected beetles for sport and would make a great show of comparing the sizes  
55 of their respective collections [13,14]. This preconception was then reinforced by studies that  
56 extrapolated from specific, targeted collections of insect diversity that focused on beetles. Of

---

<sup>1</sup> Whether or not Haldane ever actually said it exactly in this way is unresolved [11]. This phrase does not occur in any of Haldane’s writing, but he does write that “The Creator would appear as endowed with a passion for stars, on the one hand, and for beetles on the other.” [92]

57 these, perhaps the highest in profile was a study conducted by Terry Erwin. Erwin [15] used an  
58 insecticide to fog the canopies of 19 individual *Luehea seemannii* trees in a Panamanian  
59 rainforest and then collected and identified the insect species that fell out of those trees. After  
60 having identified the proportion of the beetle species that were apparently host-specific to *L.*  
61 *seemannii* (163 of 955), he estimated that there might be as many as 12.2 million beetle species  
62 in the tropics. Similar studies seeking to estimate global insect diversity have also tended to  
63 emphasize beetles (e.g., [16,17]).

64 Nevertheless, some previous work has challenged the canon, with various authors suggesting –  
65 though never quite insisting – that the Hymenoptera may be more speciose than the Coleoptera  
66 [18–21]. The premise behind this suggestion is that most of the larvae of the Parasitica (one of  
67 the two infraorders of apocritan Hymenoptera; the other is the Aculeata, which includes ants,  
68 bees, and wasps), are obligate parasites of insect and other arthropod hosts that feed on the host’s  
69 tissue until the host dies ( $\approx$  “parasitoids”). Why is this parasitic life history relevant to the  
70 Hymenoptera’s proportional contribution to insect diversity? Simply put, species of parasitoid  
71 Hymenoptera (including the Parasitica, as well as some other groups such as the Orussidae and  
72 some Chrysidoidea) attack all orders of insects as well as some non-insect arthropods [22–24],  
73 and, reciprocally, most holometabolous insect species are attacked by at least one – and often  
74 many more than one – species of hymenopteran parasitoid [25,26]. For instance, Hawkins and  
75 Lawton [27] examined parasitoid communities associated with 158 genera of British insects  
76 across five different orders, and found that parasitoid species richness ranged from 2.64 – 9.40  
77 per host species across different host insect orders.

78 If parasitoid wasps are ubiquitous and most hosts are attacked by many different species, why is  
79 there any debate at all about the Hymenoptera being more diverse than other orders? One reason

80 may be that estimates of the regional and global species-richness of parasitoid wasps remain  
81 elusive. Their small size and a relative paucity of taxonomic resources have left the parasitoid  
82 Hymenoptera relatively under-described compared to other insect orders [20,28]. As a  
83 consequence, when collection-based estimates of regional insect diversity have been attempted,  
84 they have often excluded all but the largest and easiest-to identify families of parasitic  
85 Hymenoptera (e.g., [29–31]; though see [32,33]).

86 A second reason for uncertainty regarding the species richness of the parasitoid Hymenoptera is  
87 that their host ranges are often unknown. While it may be true that most insects harbor many  
88 parasitoid species, the question remains whether these parasitoid communities are exclusively  
89 composed of oligophagous or polyphagous wasps that attack many hosts, or if instead the  
90 average insect host tends to have some number of specialist wasps among its many predators  
91 (**Figure 1**). Only in the latter case would one be able to confidently assert that the Hymenoptera  
92 is the largest of the insect orders.

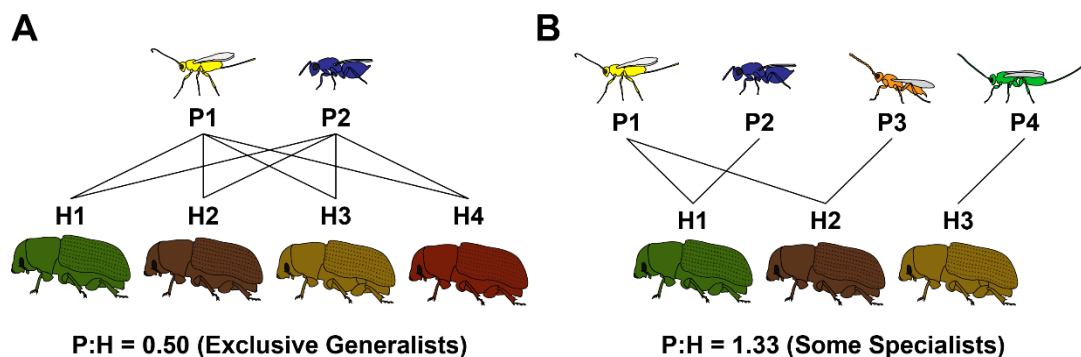

93

94 **Figure 1.** An illustration of how uncertainty about specialist vs. generalist  
95 behaviors might lead to misleading conclusions about parasitoid species  
96 richness. In panel A, each host species (differently colored beetles) is attacked  
97 by two parasitoids. However, because all parasitoids attack all four beetles the

98 overall species richness of hosts exceeds that of the parasitoids (i.e.,  $P:H < 1$ ).

99 In panel B, while some hosts have only one parasitoid, overall parasitoid

100 richness exceeds host richness ( $P:H > 1$ ) because some parasitoids are more

101 specialized.

102

103 How then to approach this question without asking the micro-hymenopterists (and the

104 coleopterists, dipterists, lepidopterists, etc.) to hurry up and describe all of the world's insect

105 species? We suggest two complementary approaches: 1) mathematically describing the values of

106 parasitoid-to-host ("P:H") ratios that would support – or contradict – the notion that the

107 Hymenoptera is the most speciose insect order and 2) tabulating – wherever possible – actual

108 P:H ratios for various genera of host insects.

109 **What parasitoid-to-host ratios would suggest that the Hymenoptera are more species-rich**  
110 **than other insect orders?**

111 For the Hymenoptera to be the largest order of insects, the global ratio of wasp parasitoids to

112 hosts (P:H) need not – in fact – equal or exceed 1.0. Indeed, a global P:H of 1.0 (i.e., an average

113 of one unique hymenopteran parasitoid species for each other insect species) would mean that

114 parasitoids account for a full half of all insects. Instead, P:H ratios need only reach values such

115 that the Hymenoptera are more species-rich than the next largest order (which, for the sake of

116 argument, we will assume is the Coleoptera). Here, we work towards finding parameters that

117 describe that space. First, it will be true that:

118 Equation 1:  $I = 1 - (P + C)$

119 Where  $P$  is the proportion of all insect species that are parasitoid Hymenoptera,  $C$  is the  
120 proportion of insects that are Coleoptera, and  $I$  is the remaining proportion of insect species  
121 (**Figure 2 A**). Note that  $I$  includes the non-parasitoid Hymenoptera while both  $I$  and  $P$  exclude  
122 the many Hymenoptera that are parasitic on other parasitoids (“hyperparasitoids”).

123 Additionally, because of the intimate relationship between parasitoids and their hosts, we can  
124 describe the proportion of species that are parasitoid Hymenoptera using the following  
125 expression:

126 Equation 2: 
$$P = C(p_C) + I(p_I)$$

127 , where  $p_C$  and  $p_I$  represent the mean P:H ratios for all coleopterans and all non-coleopterans,  
128 respectively. The true values of  $p_C$  and  $p_I$  are unknowable, but can be estimated (see next  
129 section), and their use in this way allows for exploration of the ranges of P:H ratios that would  
130 result in different relative numbers of Hymenoptera and Coleoptera. Equation 2 again excludes  
131 hyperparasitoids, as well as parasitoids of non-insect arthropods, which makes  $P$  a conservative  
132 estimate of the proportion of insect species that are parasitoids.

133 Given these two relationships, we can substitute Eq.1 into Eq. 2:

134 Equation 3: 
$$P = C(p_C) + p_I - p_I(P + C)$$

135 Equation 3 allows us to find the values of  $p_C$  and  $p_I$  that result in a  $P > C$  or vice versa. As  
136 shown in **Figure 2**, the space where  $P > C$  includes a substantial area where  $p_C$  or  $p_I$  (or both)  
137 can be  $< 1$ . For instance, if the Coleoptera make up 25% of all insects, as suggested by many  
138 contemporary authors [17,34], a  $p_C$  of only 0.25 (or one species-specialist parasitoid for every  
139 four beetle species), coupled with a  $p_I$  of 0.50, results in  $P = C$  (and the many tens of thousands  
140 of non-parasitoid Hymenoptera will then tip the scale in their favor). Even if the Coleoptera

141 amount to 40% of the insects, which reflects the percentage of currently-described insect species  
 142 that are beetles, there will be more parasitoid Hymenoptera than beetles if  $p_c$  and  $p_I$  are equal to  
 143 or in excess of 0.67 (two specialist parasitoid species for every three host species).

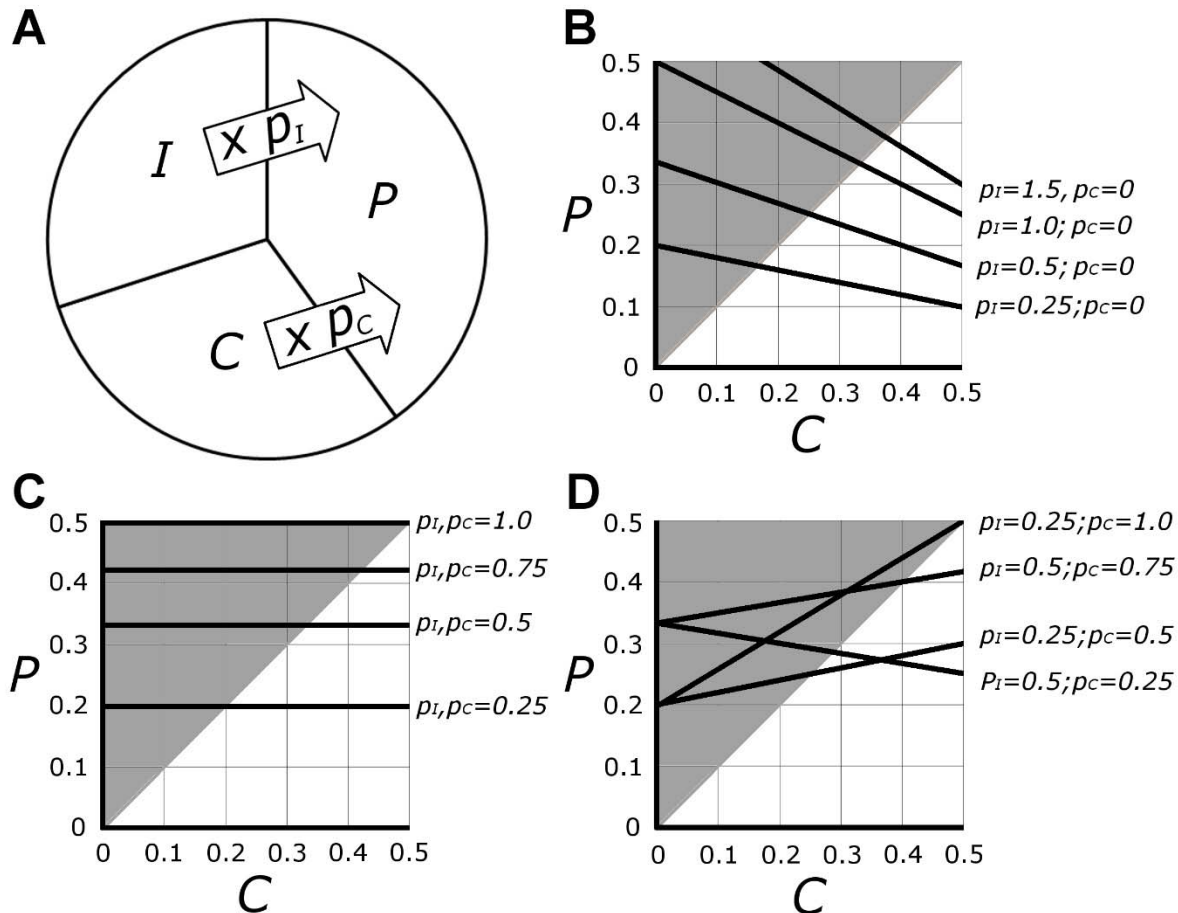

144

145 **Figure 2.** Representations of the space where the number of parasitoid wasp

146 species would outnumber the Coleoptera, given different parasitoid-to-host

147 ratios for coleopteran hosts and for other insect hosts. A) Pictorial

148 representation of the model, wherein the total number of parasitoid species ( $P$ )

149 will be the sum of the number of species of Coleoptera ( $C$ ) and of other

150 insects ( $I$ ), each first multiplied by their respective overall parasitoid-to-host



151 ratio ( $p_C$  or  $p_I$ ); B) Black lines show results of the model for four different  
152 values of  $p_I$  and with  $p_C$  held at zero (i.e., when the average coleopteran has  
153 no specialist parasitoids). Where black lines overlap with gray shaded areas  
154 represents space where  $P > C$ ; C) Results of four different scenarios in which  
155  $p_C$  and  $p_I$  are equal; D) Some additional combinations of  $p_C$  and  $p_I$ . Though  
156 both axes could continue to 1.0, some high values of  $P$  and  $C$  are not  
157 mathematically possible or biologically likely, and at  $P$  or  $C$  values above 0.5  
158 the question about relative species-richness becomes moot.

159

160 Another way to explore the values of  $p_C$  and  $p_I$  at which  $P$  will be greater than  $C$  is find the  
161 moments when the two will be equal. If we substitute  $C$  for  $P$  into Eq.3, we get:

162 Equation 4: 
$$p_C = 1 + 2p_I - \frac{p_I}{C}$$

163 We can then plot  $p_C$  vs  $p_I$  for values of  $C$  between 0 and 0.5 (**Figure 3**). Here, each line  
164 represents moments when  $P = C$ , such that the area above and to the right of each line represents  
165 values of  $p_C$  and  $p_I$  that result in a  $P > C$ . Here again,  $p_C$  and  $p_I$  need not be particularly large for  
166 the parasitoid Hymenoptera to exceed the species richness of the Coleoptera. For instance, if one  
167 quarter of all insects are beetles,  $p_C$  and  $p_I$  need only exceed 0.4 (the equivalent of two  
168 parasitoid species for every five host species).

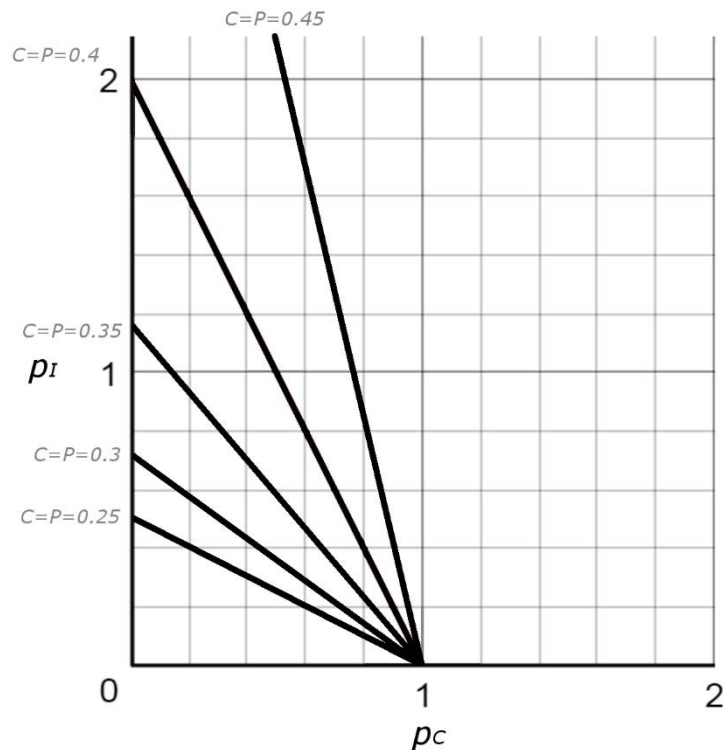

169

170

171

172

173

174

175

176

177

### What do actual P:H ratios look like in nature?

178

179

180

**Figure 3.** Plot based on Equation 4, with five representations of moments when  $C$  and  $P$  are equal proportions (solid black lines).  $p_I$  = overall P:H ratio for non-coleopteran insect hosts;  $p_C$  = overall P:H ratio for the Coleoptera. Space above and to the right of each line represents values of  $p_C$  and  $p_I$  where  $P > C$ , while space below and to the left of each line represents values where  $C > P$ .

181 records for described species are often incomplete, such that multiplying each host species by its  
182 supposed number of specialist parasitoids may often inadvertently include parasitoids that share  
183 hosts (**Figure 4**). While this is problematic, recognition of the problem helps present paths  
184 forward. For indeed, *some* host-parasitoid systems are exceedingly well studied and well-  
185 understood, such that we can be reasonably confident about the completeness of the host records  
186 of at least some parasitoids. With this information, we can calculate a metric that we call the  
187 genus-specialist parasitoid:host ratio. This metric interrogates all members of a host insect genus  
188 in the same geographic region and identifies all of the parasitoids known to attack only members  
189 of that genus (the “genus-specialist” parasitoids). Because this P:H ratio ignores all parasitoids  
190 known to attack any extra-generic host – as well as those whose host range is unknown or has  
191 been incompletely studied – it is therefore an extremely conservative estimate of the overall P:H  
192 ratio for an insect genus.

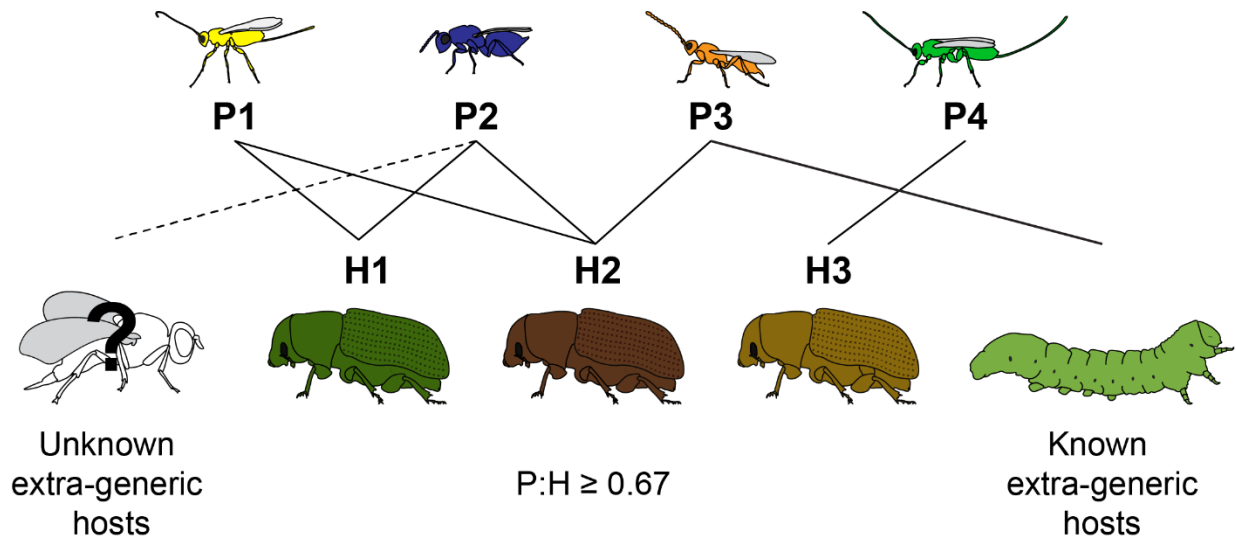

193

194

195

196

**Figure 4.** Known genus-specialist parasitoids can be used to calculate a minimum P:H ratio for an insect host genus. The focal beetle genus H (three species) has four known parasitoids, P1-P4. P1 and P4 are relatively well-

197 studied, and known to be genus-specialists, attacking only hosts in this beetle  
198 genus. P3 has some known extra-generic hosts, while the host range of P2 is  
199 poorly studied and unknown extra-generic hosts may exist. For the purposes  
200 of estimating a genus-specialist P:H, one would therefore use only P1 and P4,  
201 such that a minimum P:H for this beetle genus would be  $2/3$ , or 0.67. Note  
202 that if the total number and identities of extra-generic hosts were known for  
203 P2 and P3, a “true” P:H for the genus could be calculated (see **Synthesis**,  
204 below).

205  
206 Below, we present four case studies, representing host-parasitoid systems with records  
207 sufficiently complete to allow for calculation of genus-specialist parasitoid:host ratios. For each  
208 system, we focus on a single host genus in North America. We restricted geography so that  
209 parasitoid numbers would not be inflated by large biogeographic differences between hosts in  
210 their parasitoid assemblages. North America was chosen because sampling is relatively strong,  
211 and several robust resources exist for Nearctic parasitoids (e.g., [24,35,36]).

212 For each system, we searched for all literature that mentioned the name of the host genus (or  
213 historical synonyms) and either “parasite” or “parasitoid” and compiled a database of records,  
214 performing reticulated searches on each parasitoid species name as it was added to the database  
215 in order to determine known parasitoids host ranges. From among all parasitoid records, we  
216 classified parasitoids as “genus-specialists” if they had only ever been reared from hosts in this  
217 same genus. We then split these “genus-specialists” into two groups: those for which an  
218 argument can be made that they do not have unknown extra-generic hosts, and those that were  
219 “possible genus-specialists” but for which records were less complete. Non-hymenopteran

220 parasitoids (e.g., Tachinidae) were excluded, but in any case were only present for two of the  
221 four hosts we examined (*Malacosoma* and *Neodiprion*), and generally do not have the  
222 taxonomically cosmopolitan host ranges of the hymenopteran parasitoids. For cases where host  
223 genera were found on multiple continents, only host species in North America were included in  
224 the study, and to be conservative, a parasitoid was still considered “generalist” if it occurred on  
225 an extra-generic host species outside of North America. Introduced host species were noted but  
226 not counted in host lists, as they do not represent long-term host-parasite relationships.  
227 Introduced parasitoid species were included in generalist lists, regardless of whether they were  
228 specialists on that genus in North America or elsewhere. We describe each system below and  
229 refer the reader to Supplemental Materials for species lists, specialist / generalist classifications,  
230 and citations. A summary of data across the four genera can be found in **Table 1**.

### 231 **System 1: *Rhagoletis* (Diptera: Tephritidae)**

232 Many North American *Rhagoletis* flies are pests of agriculturally-important fruits. Eggs are  
233 deposited in ripening fruits by the female fly, and larvae develop through several instars while  
234 feeding on fruit pulp [37]. For most species, larvae then exit the fruit and pupate in the soil.  
235 Parasitoids are known from egg, larval and pupal stages of many *Rhagoletis* species. Several  
236 studies have described the parasitoid communities associated with *Rhagoletis* agricultural pest  
237 species (e.g., [37–41]), though records of parasitoids of non-pest species also exist (e.g., [42–  
238 44]). Moreover, many of the associated parasitoid species are well-studied in their own right,  
239 with robust records of their biology, ecology, and host-ranges [40,45–47].

240 Of the 24 species of North American *Rhagoletis* flies, 16 have a published record of parasitoid  
241 associations. Across these 16 flies, we found records of 39 parasitoid species, among which 24  
242 “genus-specialists” have been described only from North American *Rhagoletis* and no other

243 insect host (**Supplemental Table 1**). Of these, we set aside three “possible” genus-specialist  
244 species that did not have a strong collection record and for which host records may possibly be  
245 incomplete. The remaining set of genus-specialists included 14 braconids (genera *Diachasma*,  
246 *Diachasmimorpha*, *Utetes*, and *Opius*), six diapiids (genus *Coptera*), and a pteromalid (genus  
247 *Halticoptera*). The genus-specialist P:H ratio for *Rhagoletis* is therefore either 1.31 (21/16), or  
248 1.50 (24/16), depending on whether “possible genus-specialists” are included. An extra-  
249 conservative P:H ratio might also include the eight *Rhagoletis* hosts that have no record of  
250 parasitoids (P:H = 21/24 = 0.88), though this almost certainly ignores some number of unknown  
251 genus-specialist parasitoids.

252 Some of the 15 “generalist” parasitoids of *Rhagoletis* have been reared from a diverse set of  
253 extra-generic hosts, but in some cases only from one other fruit-infesting tephritid (e.g.,  
254 *Phygadeuon epochrae* and *Coptera evansi*, both of which have only been reared from *Rhagoletis*  
255 and from *Epochra canadensis* [Diptera: Tephritidae]). These 15 “generalists” are listed in  
256 **Supplemental Table 1**.

## 257 **System 2: *Malacosoma* (Lepidoptera: Lasiocampidae)**

258 The tent caterpillars (genus *Malacosoma*) are shelter building, cooperatively-foraging moths that  
259 damage both coniferous and deciduous trees across at least 10 families. Most species use >1 host  
260 tree genus, though some (e.g., *Malacosoma constrictum*; *Malacosoma tigris*) are more  
261 specialized [48]. There are six North American species of *Malacosoma*, some with overlapping  
262 geographic distributions [48]. Female moths lay eggs in a mass wrapped around a branch of the  
263 host tree. Larvae of most species (*M. disstria* is an exception) live colonially inside “tents” made  
264 of spun silk and make regular excursions to feed on host leaves. The caterpillar stage is eaten by  
265 birds, mammals and several insect predators, but the most taxonomically diverse natural enemies

266 are the parasitoids [48]. Of these, approximately one third are Dipteran (family Tachinidae),  
267 while the remaining two thirds are Hymenopteran parasitoids. Parasitoids attack all immature life  
268 stages, but most appear to emerge during the pre-pupal or pupal stage. Parasitoids of the North  
269 American tent caterpillars have been well documented, and often in the context of other available  
270 forest caterpillar hosts, such that it is reasonable to assert that some parasitoid species are  
271 *Malacosoma*-specific (e.g., [49–51]).

272 All six of the North American *Malacosoma* species have at least one known parasitoid  
273 association, and we compiled a total of 78 different parasitoid species across all hosts  
274 (**Supplemental Table 2**). Of these, eleven had only been reared from *Malacosoma*. Five of these  
275 eleven species we assigned to the “possible genus-specialists” category, as they had not been  
276 assigned a specific name (which makes it hard to determine whether other hosts exist), or  
277 because they had only been reared a single time from the host. The remaining six “genus-  
278 specialists,” were from four different hymenopteran families. The genus-specialist P:H ratio for  
279 *Malacosoma* is therefore between 1.00 and 1.83.

280 *Malacosoma* have many more “generalists” than *Rhagoletis*: 68 species have been reared from  
281 both *Malacosoma* and at least one other extra-genetic host (**Supplementary Table 2**). Many of  
282 these appear to be specific to Lepidopteran hosts.

### 283 **System 3: *Dendroctonus* (Coleoptera: Curculionidae).**

284 Approximately 14 species of *Dendroctonus* bark beetles are found in North America [52].  
285 *Dendroctonus* are specific to conifers in family Pinaceae, and can be highly destructive to their  
286 host trees. Female beetles construct nuptial chambers in trees where they mate with males and  
287 then deposit eggs in tunnels in the phloem. Larvae feed on phloem and outer bark and leave the

288 tree only after pupation and adult emergence [52]. Most species are tree genus- or species-  
289 specific.

290 Parasitoids have been described for eight of the 14 North American *Dendroctonus* species,  
291 though for two of these (*D. adjunctus* and *D. murryanae*) only one or two parasitoid species are  
292 known. The total list of *Dendroctonus*-associated parasitoids is long, but the records are also  
293 often problematic, as *Dendroctonus* share their habitat with several other genera of bark beetles,  
294 which may or may not be attacked by the same parasitoids. In many studies, parasitoids are listed  
295 as “associates” of either *Dendroctonus*, or of one of the other species, or of both, but this does  
296 not always necessarily mean that a parasitoid attacks that beetle [53–55]. We have here again  
297 tried to be conservative, though in one case (*Meterorus hypophloei*) we have ignored a claim of  
298 “association” with *Ips* beetles [56] as it did not seem to be well justified and other authors  
299 describe *M. hypophloei* as a *Dendroctonus frontalis* specialist [55,57]. In total, we found nine  
300 *Dendroctonus* genus-specialists, two possible genus-specialists, and 48 “generalists”  
301 (**Supplemental Table 3**). The genus-specific P:H ratio for *Dendroctonus* is therefore between  
302 1.13 and 1.38.

#### 303 **System 4: *Neodiprion* (Hymenoptera: Diprionidae)**

304 *Neodiprion* is a Holarctic genus of pine-feeding sawflies specializing on conifers in the family  
305 Pinaceae [58]. These sawflies have close, life-long associations with their tree hosts. The short-  
306 lived, non-feeding adults mate on the host plant shortly after eclosion, after which the females  
307 deposit their eggs into pockets cut within the host needles. The larvae hatch and feed externally  
308 on the host needles throughout development, and then spin cocoons on or directly beneath the  
309 host [59–61]. Many species also have highly specialized feeding habits, and feed on a single or  
310 small handful of host-plant species in the genus *Pinus*. Since many of the ~33 *Neodiprion*



311 species native to North America are considered economic pests [62], considerable effort has  
312 gone into describing their natural history and exploring potential methods to control *Neodiprion*  
313 outbreaks.

314 Despite the wealth of natural history information, compiling a list of parasitoids attacking  
315 *Neodiprion* is complicated by a history of accidental and intentional introductions. In addition to  
316 the native species, the European pine sawfly, *Neodiprion sertifer*, and three species from the  
317 closely related genera *Diprion* and *Gilpinia* were introduced in the past ~150 years and have  
318 spread across the United States and Canada [63–66]. In an attempt to control these invasive  
319 pests, several parasitoids have been introduced, and now attack both native and invasive  
320 diprionids [67–69].

321 We found 20 genus-specialist parasitoid species associated with the 21 species of North  
322 American *Neodiprion* for which parasitoid records exist. An additional seven parasitoids were  
323 classified as “possible” genus-specialists. The genus-specific P:H ratio for *Neodiprion* is  
324 therefore between 0.95 and 1.29. An additional 51 species had been reared from both *Neodiprion*  
325 and an extra-generic host, with nine introduced parasitoids. We also compiled a list of 14  
326 introduced parasitoids, nine hyperparasitoids, and 28 tachinid (Diptera) parasitoids of *Neodiprion*  
327 (**Supplemental Table 4**), but these were not included in any analyses.

328

## 329 **Synthesis**

330 Upon considering our model together with actual estimates of P:H ratios from natural host  
331 systems (**Table 1**), there appear to be few conditions under which the Hymenoptera would not be  
332 the largest order of insects. If, for instance, the P:H ratios for *Rhagoletis*, *Malacosoma*,

333 *Dendroctonus*, and *Neodiprion* are at all representative of other hosts in those respective orders,  
334 and we use them to calculate relative species richness based on recent counts of only the  
335 *described* species in each order [70], the Hymenoptera exceed the Coleoptera by 2.5-3.2 times  
336 (**Table 2**). Recall that these calculations ignore all hyperparasitoids, and also omit parasitoids of  
337 other insect orders (e.g., Hemiptera, Orthoptera) and of non-insect arthropods. Even if we use  
338 half of the lowest P:H ratio estimate for each of the four largest orders, the Hymenoptera would  
339 outnumber the Coleoptera by more than 1.3 times.

340 Note that P:H ratios might be measured more accurately and / or calculated in different ways,  
341 most of which we would expect to increase the estimates of P:H reported here. For instance,  
342 rather than ignoring all of the so-called “generalist” parasitoids, one could identify those for  
343 which host ranges are known (e.g., **Figure 4**), divide each by the total number of host genera  
344 attacked, and add that fraction to the numerator of the P:H ratio for the focal host genus. As one  
345 example, the “generalist” parasitoids *Phygadeuon epochrae* and *Coptera evansi* both attack only  
346 *Rhagoletis* flies and the currant fly *Epochra canadensis*. These would each add an additional 0.5  
347 to the other 24 “genus-specialist” parasitoids of *Rhagoletis*, giving a revised P:H of 1.56. For  
348 *Malacosoma*, *Dendroctonus*, and *Neodiprion*, which all have many “generalist” parasitoids with  
349 host ranges that include only a few other extra-generic hosts in the same respective family, such  
350 additions should increase P:H ratio estimates by a considerable margin.

351 Another way to calculate P:H would be to focus not on a host genus but on hosts sharing the  
352 same habitat. For instance, *Dendroctonus* bark beetles share their habitat niche with several other  
353 species of beetle, and many of their parasitoids are “specialists” in the sense that they attack  
354 more than one bark beetle, but all within the same tree habitat [55]. One could, therefore,  
355 calculate a P:H where H is the number of potential beetle host species in the habitat, and P is the

356 number of “habitat-specialist” parasitoid species (those that attack one or more of the hosts in  
357 that habitat and no other hosts in other habitats).

358 Our analyses largely ignore the increasingly common finding that many apparently polyphagous  
359 insects – both herbivores and parasitoids – show evidence of additional host-associated genetic  
360 structure that might, if considered here as distinct lineages, change P:H ratios (e.g., [71–75]).  
361 Indeed, all four of our focal host genera have named subspecies or show evidence for host-  
362 associated, reproductively-isolated lineages [52,76–78]. Though we chose to “lump” subspecies  
363 and other reproductively isolated lineages together for this analysis, it is interesting to consider  
364 how a detailed study of genetic diversity and reproductive isolation among a host genus and all  
365 of its associated parasitoids might change P:H ratios. Studies of the flies in the *Rhagoletis*  
366 *pomonella* species complex and three of their associated parasitoids suggest that where  
367 additional host-associated lineages are found in a phytophagous insect, this cryptic diversity may  
368 be multiplied many times over in its specialist parasitoid community [46,79]. If broadly true, this  
369 implies that genus-specific P:H ratios may often be much higher than we report here.

370 One sensible criticism will surely be: to what extent are the P:H ratios for these four genera  
371 reflective of global P:H ratios for their respective orders (Coleoptera, Lepidoptera, Diptera, and  
372 the non-parasitoid Hymenoptera)? Surely some insect genera escape parasitism, and perhaps the  
373 examples chosen here simply have exceptionally large, or unusually specialized, parasitoid  
374 communities. As to the former, it may be that such escape artists exist, but they also may be  
375 relatively rare. After all, there are parasitoids that attack aquatic insects [80,81], that parasitize  
376 insects in Arctic communities (e.g., [82]), and even those that dig down into soils to unearth and  
377 oviposit into pupae [45]. The list of potential hosts for parasitoids also extends to many non-  
378 insect arthropods, including spiders, mites, and nematodes [83,84]. As to the four example

379 genera being representative of overly large parasitoid communities, all of their “overall” P:H  
380 numbers (**Table 1**) are actually below the means found for their respective orders in an extensive  
381 study of parasitoid communities in Britain [27], suggesting that these communities are of  
382 average, or slightly below-average, size.

383

### 384 **Concluding Thoughts**

385 While it may indeed be premature to claim that the Hymenoptera is the largest order of insects  
386 based solely on our data, many other studies offer support for the same conclusion. In fact, the  
387 preponderance of evidence suggests that the common wisdom about the Coleoptera being the  
388 most speciose is the more dubious claim. Studies of insect diversity that reduce taxonomic biases  
389 have found the Hymenoptera to be the most species-rich in both temperate [32] and tropical [33]  
390 forests, as well as in other habits (e.g., [85,86]). In addition, a mass-barcoding study of Canadian  
391 insects found both Hymenoptera and Diptera more diverse than Coleoptera [87]. Moreover, other  
392 historically-accepted ideas about diversity of parasitoid hymenopterans have recently been  
393 questioned, including the apparent myth that parasitoids are one of only a few groups whose  
394 diversity decreases towards the tropics [88,89]. In any case, we hope this commentary results in a  
395 redoubled effort to understand and describe the ecology and natural histories of parasitoid wasps,  
396 including host ranges and cryptic host-associated diversity, such that estimates of P:H can be  
397 made for additional host genera. We also hope to see similar efforts in other animal groups that  
398 may harbor great diversity but for which far too little is known about host ranges, such as  
399 particularly speciose orders of mites and nematodes (e.g., [90,91]. In other words, and to again  
400 quote Erwin [15], we hope that “...someone will challenge these figures with more data.”

401

## 402 **Competing Interests**

403 We have no competing interests.

404

## 405 **Authors' Contributions**

406 AAF conceived of the study. All authors helped formulate a framework for addressing the  
407 questions in the paper, developed the logical model, and collected and analyzed data from the  
408 four host genera. AAF and RKB wrote the manuscript. All authors gave final approval for  
409 publication.

410

## 411 **Acknowledgements**

412 We thank Isaac Winkler, Anna Ward, Eric Tvedte, Miles Zhang, Glen Hood, and Matt Yoder for  
413 their thoughtful discussions and comments on this manuscript.

414

## 415 **Funding**

416 Projects funded by the National Science Foundation to AAF (DEB 1145355 and 1542269) led  
417 directly to the discussions that motivated this study.

418 **References**

- 419 1. Rice ME. Terry L. Erwin: She had a black eye and in her arm she held a skunk. *Zookeys*.  
420 Pensoft Publishers; 2015;500:9–24.
- 421 2. Kirby W, Spence W. *An Introduction to Entomology*. London: Longman, Hurt, Rees, Orme,  
422 and Brown; 1818.
- 423 3. Westwood JO. On the probable number of species of insects in the Creation; together with  
424 descriptions of several minute Hymenoptera. *Mag Nat Hist J Zool Bot Mineral Geol Meteorol*.  
425 1833;6:116–23.
- 426 4. Hutchinson GE. Homage to Santa Rosalia or why are there so many kinds of animals? *Am*  
427 *Nat*. 1959;93:145–59.
- 428 5. Farrell BD. “Inordinate fondness” explained: Why are there so many beetles? *Science*.  
429 1998;281:555–9.
- 430 6. Hunt T, Bergsten J, Levkanicova Z, Papadopoulou A, John O St., Wild R, et al. A  
431 comprehensive phylogeny of beetles reveals the evolutionary origins of a superradiation.  
432 *Science*. 2007;318:1913–6.
- 433 7. McKenna D, Farrell BD. Beetles (Coleoptera). In: Hedges S, Kumar S, editors. *The Timetree*  
434 *of Life*. Oxford: Oxford University Press; 2009. p. 278–89.
- 435 8. Zhang ZQ. Animal biodiversity: An introduction to higher-level classification and taxonomic  
436 richness. *Zootaxa*. 2011;12:7–12.
- 437 9. Wiens JJ, Lapoint RT, Whiteman NK. Herbivory increases diversification across insect clades.  
438 *Nat Commun*. 2015;6:8370.

- 439 10. Zhang S-Q, Che L-H, Li Y, Dan Liang, Pang H, Ślipiński A, et al. Evolutionary history of  
440 Coleoptera revealed by extensive sampling of genes and species. *Nat Commun.* 2018;9:205.
- 441 11. Gould S. A special fondness for beetles. *Nat Hist.* 1993;102:4–8.
- 442 12. Bouchard P, Grebennikov V V., Smith ABT, Douglas H. Biodiversity of Coleoptera. In:  
443 Foottit RG, Adler PH, editors. *Insect Biodiversity: Science and Society.* Oxford: Wiley-  
444 Blackwell; 2009. p. 265–301.
- 445 13. Browne J. *Charles Darwin: Voyaging.* Princeton, NJ: Princeton University Press; 1996.
- 446 14. Sheppard CA. Benjamin Dann Walsh: Pioneer entomologist and proponent of Darwinian  
447 theory. *Annu Rev Entomol.* 2004;49:1–25.
- 448 15. Erwin TL. Tropical forests: Their richness in Coleoptera and other arthropod species.  
449 *Coleopt Bull.* 1982;36:74–5.
- 450 16. Ødegaard F. How many species of arthropods? Erwin’s estimate revised. *Biol J Linn Soc.*  
451 *Oxford University Press*; 2000;71:583–97.
- 452 17. Stork NE, McBroom J, Gely C, Hamilton AJ. New approaches narrow global species  
453 estimates for beetles, insects, and terrestrial arthropods. *Proc Natl Acad Sci U S A.*  
454 2015;112:7519–23.
- 455 18. LaSalle J. Parasitic Hymenoptera, biological control and biodiversity. In: LaSalle J, Gauld  
456 ID, editors. *Hymenoptera and Biodiversity.* Wallingford, UK: CAB International; 1993. p. 197–  
457 215.
- 458 19. LaSalle J, Gauld ID. Hymenoptera: their diversity, and their impact on the diversity of other  
459 organisms. *Hymenoptera and Biodiversity.* Wallingford, UK: CAB International; 1993. p. 1–26.

- 460 20. Gaston KJ. Spatial patterns in the description and richness of the Hymenoptera. In: LaSalle J,  
461 Gauld ID, editors. Hymenoptera and Biodiversity. Wallingford, UK: CAB International; 1993. p.  
462 277–93.
- 463 21. Austin AD, Dowton M. Hymenoptera: Evolution, Biodiversity, and Biological Control.  
464 Clayton, Australia: CSIRO Publishing; 2000.
- 465 22. Gibson GAP, Huber JT, Woolley JB. Annotated Keys to the Genera of Nearctic Chalcidoidea  
466 (Hymenoptera). Ottawa: NRC Research Press; 1997.
- 467 23. Wharton R, Marsh P, Sharkey M. Manual of the New World genera of the family Braconidae  
468 (Hymenoptera). Spec Publ Int Soc Hymenopterists. 1997;1:1–439.
- 469 24. Noyes J. Universal Chalcidoidea Database. 2017. <http://www.nhm.ac.uk/chalcidoids>.  
470 Accessed 23 Nov 2017.
- 471 25. Schoenly K. The predators of insects. *Ecol Entomol*. 1990;15:333–45.
- 472 26. Memmott J, Godfray HCJ. Parasitoid webs. In: LaSalle J, Gauld ID, editors. Hymenoptera  
473 and Biodiversity. Wallingford, UK: CAB International; 1993. p. 217–34.
- 474 27. Hawkins BA, Lawton JH. Species richness for parasitoids of British phytophagous insects.  
475 *Nature*. 1987;326:788–90.
- 476 28. Huber JT. Biodiversity of Hymenoptera. In: Foottit RG, Adler PH, editors. *Insect*  
477 *Biodiversity: Science and Society*. Oxford: Wiley-Blackwell; 2009. p. 303–23.
- 478 29. Novotny V, Basset Y, Miller SE, Weiblen GD, Bremer B, Cizek L, et al. Low host  
479 specificity of herbivorous insects in a tropical forest. *Nature*. 2002;416:841–4.
- 480 30. Pietsch TW, Bogatov V V., Amaoka K, Zhuravlev YN, Barkalov VY, Gage S, et al.



- 481 Biodiversity and biogeography of the islands of the Kuril Archipelago. *J Biogeogr.*  
482 2003;30:1297–310.
- 483 31. Basset Y, Cizek L, Cuénoud P, Didham RK, Guilhaumon F, Missa O, et al. Arthropod  
484 diversity in a tropical forest. *Science*. 2012;338:1481–4.
- 485 32. Gaston KJ. The magnitude of global insect species richness. *Conserv Biol*. 1991;5:283–96.
- 486 33. Stork NE. The composition of the arthropod fauna of Bornean lowland rain forest trees. *J*  
487 *Trop Ecol*. 1991;7:161–80.
- 488 34. Hamilton AJ, Novotný V, Waters EK, Basset Y, Benke KK, Grimbacher PS, et al.  
489 Estimating global arthropod species richness: Refining probabilistic models using probability  
490 bounds analysis. *Oecologia*. 2013;171:357–65.
- 491 35. Peck O. A catalogue of the Nearctic Chalcidoidea (Insecta: Hymenoptera). *Mem Entomol*  
492 *Soc Canada*. 1963;95:5–1092.
- 493 36. Krombein K, Hurd P, Smith D, Burks B. Catalog of Hymenoptera in America North of  
494 Mexico. Washington, D.C.: Smithsonian Institution Press; 1979.
- 495 37. Bush GL. The taxonomy, cytology, and evolution of the genus *Rhagoletis* in North America  
496 (Diptera, Tephritidae). *Bull Museum Comp Zool*. 1966;134:431–562.
- 497 38. Lathrop F, Newton R. The biology of *Opus melleus* Gahan, a parasite of the blueberry  
498 maggot. *J Agric Res*. 1933;46:143–60.
- 499 39. Cameron P, Morrison F. *Psilus* sp. (Hymenoptera: Diapriidae), a parasite of the pupal stage  
500 of the apple maggot, *Rhagoletis pomonella* (Diptera: Tephritidae) in south-western Quebec.  
501 *Phytoprotection*. 1974;55:13–6.

- 502 40. Wharton RA, Marsh PM. New World Opiinae (Hymenoptera: Braconidae) parasitic on  
503 Tephritidae (Diptera). *J Washingt Acad Sci.* 1978;68:147–67.
- 504 41. Feder JL. The effects of parasitoids on sympatric host races of *Rhagoletis pomonella*  
505 (Diptera: Tephritidae). *Ecology.* 1995;76:801–13.
- 506 42. Rull J, Wharton R, Feder JL, Guillén L, Sivinski J, Forbes A, et al. Latitudinal variation in  
507 parasitoid guild composition and parasitism rates of North American hawthorn infesting  
508 *Rhagoletis*. *Environ Entomol.* 2009;38:588–99.
- 509 43. Forbes AA, Hood GR, Feder JL. Geographic and ecological overlap of parasitoid wasps  
510 associated with the *Rhagoletis pomonella* (Diptera: Tephritidae) species complex. *Ann Entomol*  
511 *Soc Am.* 2010;103:908–15.
- 512 44. Forbes AA, Satar S, Hamerlinck G, Nelson AE, Smith JJ. DNA barcodes and targeted  
513 sampling methods identify a new species and cryptic patterns of host specialization among North  
514 American *Coptera* (Hymenoptera: Diapriidae). *Ann Entomol Soc Am.* 2012;105:608–12.
- 515 45. Muesebeck C. The Nearctic parasitic wasps of the genera *Psilus Panzer* and *Coptera Say*  
516 (Hymenoptera, Proctotrupeoidea, Diapriidae). *Technical Bulletin 1617*. Washington, D.C.: United  
517 States Department of Agriculture Science and Education Administration; 1980.
- 518 46. Forbes AA, Powell THQ, Stelinski LL, Smith JJ, Feder JL. Sequential sympatric speciation  
519 across tropic levels. *Science.* 2009;323:776–9.
- 520 47. Wharton R, Yoder M. Parasitoids of fruit-infesting Tephritidae. 2017. <http://paroffit.org>.  
521 Accessed 15 October 2017.
- 522 48. Fitzgerald TD. *The Tent Caterpillars*. Ithaca, NY: Cornell University Press; 1995.

- 523 49. Langston RL. A synopsis of hymenopterous parasites of *Malacosoma* in California  
524 (Lepidoptera, Lasiocampidae). Lingsley E, Smith R, Steinhaus E, Usinger R, editors. Univ Calif  
525 Publ Entomol. Berkeley, CA: University of California Press; 1957;14:1–50.
- 526 50. Stacey L, Roe R, Williams K. Mortality of eggs and pharate larvae of the eastern tent  
527 caterpillar, *Malacosoma americana* (F.) (Lepidoptera: Lasiocampidae). J Kansas Entomol Soc.  
528 1975;48:521–3.
- 529 51. Shaw S. *Aleiodes* wasps of eastern forests: A guide to parasitoids and associated mummified  
530 caterpillars. *FHTET-2006-08*. Washington, D.C.: United States Department of Agriculture Forest  
531 Service, Forest Health Technology Enterprise Team; 2006.
- 532 52. Six DL, Bracewell R. *Dendroctonus*. In: Vega FE, Hofstetter RW, editors. Bark Beetles Biol  
533 Ecol Nativ Invasive Species. Oxford: Academic Press; 2015. p. 305–50.
- 534 53. Overgaard N. Insects associated with southern pine beetle in Texas, Louisiana, and  
535 Mississippi. J Econ Entomol. 1968;61:197–201.
- 536 54. Langor DW. Arthropods and nematodes co-occurring with the eastern larch beetle,  
537 *Dendroctonus simplex* [Col.: Scolytidae], in Newfoundland. Entomophaga. 1991;36:303–13.
- 538 55. Berisford CW. Parasitoids of the southern pine beetle. In: Coulson R, Klepzig K, editors.  
539 South Pine Beetle II *General Tech Rep SRS-140*. Asheville, NC: United States Department of  
540 Agriculture Forest Service, Southern Research Station; 2011. p. 129–39.
- 541 56. Kulhavy D, Goyer RA, Bing JW, Riley M. *Ipps* spp. natural enemy relationships in the Gulf  
542 Coastal states. Stephen F Austin State Univ Fac Publ. 1989;Paper 300:157–67.
- 543 57. Stein CR, Coster JE. Distribution of some predators and parasites of southern pine beetle in

- 544 two species of pine. *Environ Entomol.* 1977;6:689–94.
- 545 58. Smith DR. Systematics, Life History, and Distribution of Sawflies. In: Wagner MR, Raffa  
546 KF, editors. *Sawfly Life History Adaptations to Woody Plants*. San Diego: Academic Press;  
547 1993. p. 3–32.
- 548 59. Coppel HC, Benjamin DM. Bionomics of the Nearctic pine-feeding Diprionids. *Annu Rev*  
549 *Entomol.* 1965;10:69–96.
- 550 60. Knerer G, Atwood CE. Diprionid sawflies: Polymorphism and speciation. *Science*.  
551 1973;179:1090–9.
- 552 61. Knerer G. Life history diversity in sawflies. In: Wagner MR, Raffa KF, editors. *Sawfly Life*  
553 *History Adaptations to Woody Plants*. San Diego: Academic Press; 1993. p. 33–60.
- 554 62. Arnett RH. *American Insects: A Handbook of the Insects of America North of Mexico*.  
555 Gainesville, FL: Sandhill Crane Press; 1993.
- 556 63. Britton W. A destructive pine sawfly introduced from Europe, *Diprion (Lophyrus) simile*  
557 Hartig. *J Econ Entomol.* 1915;8:379–82.
- 558 64. Gray D. Notes on the occurrence of *Diprion frutetorum* Fabr. in southern Ontario. *Annu Rep*  
559 *Entomol Soc Ontario.* 1938;68:50–1.
- 560 65. Balch R. The outbreak of the European spruce sawfly in Canada and some important features  
561 of its bionomics. *J Econ Entomol.* 1939;32:412–8.
- 562 66. Schaffner Jr. J V. *Neodiprion sertifer* (Geoff.), a pine sawfly accidentally introduced into  
563 New Jersey from Europe. *J Econ Entomol.* 1939;32:887–8.
- 564 67. Finlayson LR, Reeks WA. Notes on the introduction of *Diprion* parasites to Canada. *Can*

- 565 Entomol. 1936;68:160–6.
- 566 68. Finlayson T. Taxonomy of cocoons and puparia, and their contents, of Canadian parasites of  
567 some native Diprionidae (Hymenoptera). *Can Entomol.* 1963;95:475–507.
- 568 69. MacQuarrie CJK, Lyons DB, Lukas Seehausen M, Smith SM. A history of biological control  
569 in Canadian forests, 1882-2014. *Can Entomol.* 2016;148:S239–69.
- 570 70. Adler PH, Foottit R. Introduction. In: Foottit RG, Adler PH, editors. *Insect Biodiversity:  
571 Science and Society*. Oxford: Wiley-Blackwell; 2009. p. 1–6.
- 572 71. Drès M, Mallet J. Host races in plant-feeding insects and their importance in sympatric  
573 speciation. *Philos Trans R Soc B Biol Sci.* 2002;357:471–92.
- 574 72. Stireman JO, Nason JD, Heard SB, Seehawer JM. Cascading host-associated genetic  
575 differentiation in parasitoids of phytophagous insects. *Proc R Soc B Biol Sci.* 2006;273:523–30.
- 576 73. Smith MA, Rodriguez JJ, Whitfield JB, Deans AR, Janzen DH, Hallwachs W, et al. Extreme  
577 diversity of tropical parasitoid wasps exposed by iterative integration of natural history, DNA  
578 barcoding, morphology, and collections. *Proc Natl Acad Sci.* 2008;105:12359–64.
- 579 74. Condon MA, Scheffer SJ, Lewis ML, Wharton R, Adams DC, Forbes AA. Lethal  
580 interactions between parasites and prey increase niche diversity in a tropical community.  
581 *Science.* 2014;343:1240–4.
- 582 75. Forbes AA, Devine SN, Hippee AC, Tvedte ES, Ward AKG, Widmayer HA, et al. Revisiting  
583 the particular role of host shifts in initiating insect speciation. *Evolution.* 2017;71:1126–37.
- 584 76. Stehr FW, Cook EF. A revision of the genus *Malacosoma* Hübner in North America  
585 (Lepidoptera: Lasiocampidae): Systematics, biology, immatures, and parasites. *United States*

- 586 *National Museum Bulletin* 276. Washington, D.C.: Smithsonian Institution Press; 1968.
- 587 77. Powell THQ, Forbes AA, Hood GR, Feder JL. Ecological adaptation and reproductive  
588 isolation in sympatry: Genetic and phenotypic evidence for native host races of *Rhagoletis*  
589 *pomonella*. *Mol Ecol*. 2014;23:688–704.
- 590 78. Bagley RK, Sousa VC, Niemiller ML, Linnen CR. History, geography and host use shape  
591 genomewide patterns of genetic variation in the redheaded pine sawfly (*Neodiprion lecontei*).  
592 *Mol Ecol*. 2017;26:1022–44.
- 593 79. Hood GR, Forbes AA, Powell THQ, Egan SP, Hamerlinck G, Smith JJ, et al. Sequential  
594 divergence and the multiplicative origin of community diversity. *Proc Natl Acad Sci*.  
595 2015;112:E5980–9.
- 596 80. Juliano SA. *Trichogramma* spp. (Hymenoptera: Trichogrammatidae) as egg parasitoids of  
597 *Sepedon fuscipennis* (Diptera: Sciomyzidae) and other aquatic Diptera. *Can Entomol*.  
598 1981;113:271–9.
- 599 81. Elliott JM. The life cycle and spatial distribution of the aquatic parasitoid *Agriotypus armatus*  
600 (Hymenoptera: Agriotypidae) and its caddis host *Silo pallipes* (Trichoptera: Goeridae). *J Anim*  
601 *Ecol*. 1982;51:923–41.
- 602 82. Fernandez-Triana J, Smith MA, Boudreault C, Goulet H, Hebert PDN, Smith AC, et al. A  
603 poorly known high-latitude parasitoid wasp community: Unexpected diversity and dramatic  
604 changes through time. *PLoS One*. 2011;6:e23719.
- 605 83. Lasalle J. North American genera of Tetrastichinae (Hymenoptera: Eulophidae). *J Nat Hist*.  
606 1994;28:109–236.

- 607 84. Finch OD. The parasitoid complex and parasitoid-induced mortality of spiders (Araneae) in a  
608 Central European woodland. *J Nat Hist.* 2005;39:2339–54.
- 609 85. Stahlhut JK, Fernández-Triana J, Adamowicz SJ, Buck M, Goulet H, Hebert PD, et al. DNA  
610 barcoding reveals diversity of Hymenoptera and the dominance of parasitoids in a sub-arctic  
611 environment. *BMC Ecol.* 2013;13:2.
- 612 86. Kimsey L, Zavortink T, Kimsey R, Heydon S. Insect biodiversity of the Algodones Dunes of  
613 California. *Biodivers Data J.* 2017;5:e21715.
- 614 87. Hebert PDN, Ratnasingham S, Zakharov E V, Telfer AC, Levesque-Beaudin V, Milton MA,  
615 et al. Counting animal species with DNA barcodes: Canadian insects. *Philos Trans R Soc B Biol*  
616 *Sci.* 2016;371:20150333.
- 617 88. Veijalainen A, Wahlberg N, Broad GR, Erwin TL, Longino JT, Saaksjarvi IE.  
618 Unprecedented ichneumonid parasitoid wasp diversity in tropical forests. *Proc R Soc B Biol Sci.*  
619 2012;279:4694–8.
- 620 89. Eagalle T, Smith MA. Diversity of parasitoid and parasitic wasps across a latitudinal  
621 gradient: Using public DNA records to work within a taxonomic impediment. Kevan PG, editor.  
622 *FACETS.* 2017;2:937–54.
- 623 90. Grucmanová Š, Holuša J. Nematodes associated with bark beetles, with focus on the genus  
624 *Ips* (Coleoptera: Scolytinae) in Central Europe. *Acta Zool Bulg.* 2013;65:547–56.
- 625 91. Walter DE, Proctor HC. *Mites: Ecology, Evolution & Behaviour: Life at a Microscale.* 2nd  
626 ed. Dordrecht, Netherlands: Springer Netherlands; 2013.
- 627 92. Haldane J. *What is Life? The Layman's View of Nature.* London: Lindsay Drummond; 1949.

628 **Table 1. Summary of estimates of parasitoid to host (P:H) ratios for four host insect**  
 629 **genera.** Shown for each host genus are: the total number of North American (NA) species, as  
 630 well as the number with parasitoid records; the overall P:H, which includes generalist species;  
 631 the genus-specialist P:H; and the genus-specialist P:H when “possible genus-specialists” were  
 632 included. Parasitoid families that were among each group of genus-specialists are also listed.  
 633

| Focal Host<br>Genus                                   | # NAM<br>Species<br>(# with<br>parasitoid<br>records) | P:H (overall) | P:H                                    |                                                                  | Genus-specialist<br>families                                   |
|-------------------------------------------------------|-------------------------------------------------------|---------------|----------------------------------------|------------------------------------------------------------------|----------------------------------------------------------------|
|                                                       |                                                       |               | P:H<br>(genus-<br>specialists<br>only) | (specialist)<br>[including<br>possible<br>genus-<br>specialists] |                                                                |
| <i>Rhagoletis</i><br>(Diptera:<br>Tephritidae)        | 24 (16)                                               | 2.44          | 1.31                                   | 1.50                                                             | Braconidae;<br>Diapriidae;<br>Pteromalidae                     |
| <i>Malacosoma</i><br>(Lepidoptera:<br>Lasiocampidae)  | 6 (6)                                                 | 13.00         | 1.00                                   | 1.83                                                             | Braconidae;<br>Eulophidae;<br>Ichneumonidae;<br>Platygastridae |
| <i>Dendroctonus</i><br>(Coleoptera:<br>Curculionidae) | 14 (8)                                                | 6.50          | 1.13                                   | 1.38                                                             | Braconidae;<br>Ichneumonidae;<br>Gasteruptionidae              |



|                   |         |      |      |      |  |                 |
|-------------------|---------|------|------|------|--|-----------------|
|                   |         |      |      |      |  | Proctotrupidae; |
|                   |         |      |      |      |  | Pteromalidae;   |
|                   |         |      |      |      |  | Platygastridae  |
| <i>Neodiprion</i> |         |      |      |      |  |                 |
| (Hymenoptera:     | 33 (21) | 3.48 | 0.95 | 1.29 |  | Ichneumonidae;  |
| Diprionidae)      |         |      |      |      |  | Chrysididae     |

634

635 **Table 2. Calculations of hymenopteran species richness, given numbers of described insect**  
 636 **species in other orders and P:H ratios estimated in this paper.** Combining conservative P:H  
 637 ratio estimates from four case studies with numbers of described species in the four largest insect  
 638 orders [28,70] offers an idea of how species richness of the Hymenoptera may compare with that  
 639 of other orders. <sup>a</sup>Parasitoids attack hosts in all other insect orders, but these are omitted as we did  
 640 not estimate P:H ratios for any hosts in these orders. Total numbers therefore exclude large  
 641 numbers of hymenopteran species.

|                                                                            | High P:H<br>estimates from<br>case studies | Low P:H estimates<br>from case studies | Half of lowest<br>estimates from<br>case studies |
|----------------------------------------------------------------------------|--------------------------------------------|----------------------------------------|--------------------------------------------------|
| Diptera (152,244)                                                          | 228,366                                    | 199,440                                | 99,720                                           |
| Lepidoptera (156,793)                                                      | 286,931                                    | 156,793                                | 78,397                                           |
| Coleoptera (359,891)                                                       | 494,850                                    | 406,677                                | 203,338                                          |
| Non-parasitoid Hymenoptera<br>(~62,000)                                    | 79,980                                     | 58,900                                 | 29,450                                           |
| All other insect orders (335,970)                                          | 0 <sup>a</sup>                             | 0 <sup>a</sup>                         | 0 <sup>a</sup>                                   |
| <b>TOTAL PARASITOID</b>                                                    | <b>1,107,487</b>                           | <b>833,590</b>                         | <b>416,795</b>                                   |
| <b>HYMENOPTERA</b>                                                         |                                            |                                        |                                                  |
| Non-parasitoid Hymenoptera (to<br>add to calculated parasitoid<br>numbers) | 62,000                                     | 62,000                                 | 62,000                                           |
| <b>TOTAL HYMENOPTERA</b>                                                   | <b>1,152,127</b>                           | <b>883,810</b>                         | <b>472,905</b>                                   |

642

643 **Figure Captions.**

644 **Figure 1.** An illustration of how uncertainty about specialist vs. generalist behaviours might lead  
645 to misleading conclusions about parasitoid species richness. In panel A, each host species  
646 (differently colored beetles) is attacked by two parasitoids. However, because all parasitoids  
647 attack all four beetles the overall species richness of hosts exceeds that of the parasitoids (i.e.,  
648  $P:H < 1$ ). In panel B, while some hosts have only one parasitoid, overall parasitoid richness  
649 exceeds host richness ( $P:H > 1$ ) because some parasitoids are more specialized.

650

651 **Figure 2.** Representations of the space where the number of parasitoid wasp species would  
652 outnumber the Coleoptera, given different parasitoid-to-host ratios for coleopteran hosts and for  
653 other insect hosts. A) Pictorial representation of the model, wherein the total number of  
654 parasitoid species ( $P$ ) will be the sum of the number of species of Coleoptera ( $C$ ) and of other  
655 insects ( $I$ ), each first multiplied by their respective overall parasitoid-to-host ratio ( $p_C$  or  $p_I$ ); B)  
656 Black lines show results of the model for four different values of  $p_I$  and with  $p_C$  held at zero (i.e.,  
657 when the average coleopteran has no specialist parasitoids). Where black lines overlap with gray  
658 shaded areas represents space where  $P > C$ ; C) Results of four different scenarios in which  $p_C$   
659 and  $p_I$  are equal; D) Some additional combinations of  $p_C$  and  $p_I$ . Though both axes could  
660 continue to 1.0, some high values of  $P$  and  $C$  are not mathematically possible or biologically  
661 likely, and at  $P$  or  $C$  values above 0.5 the question about relative species-richness becomes moot.

662

663 **Figure 3.** Plot based on Equation 4, with five representations of moments when  $C$  and  $P$  are  
664 equal proportions (solid black lines).  $p_I$  = overall P:H ratio for non-coleopteran insect hosts;  $p_C$  =

665 overall P:H ratio for the Coleoptera. Space above and to the right of each line represents values  
666 of  $p_C$  and  $p_I$  where  $P > C$ , while space below and to the left of each line represents values where  
667  $C > P$ .

668  
669 **Figure 4.** Known genus-specialist parasitoids can be used to calculate a minimum P:H ratio for  
670 an insect host genus. The focal beetle genus H (three species) has four known parasitoids, P1-P4.  
671 P1 and P4 are relatively well-studied, and known to be genus-specialists, attacking only hosts in  
672 this beetle genus. P3 has some known extra-generic hosts, while the host range of P2 is poorly  
673 studied and unknown extra-generic hosts may exist. For the purposes of estimating a genus-  
674 specialist P:H, one would therefore use only P1 and P4, such that a minimum P:H for this beetle  
675 genus would be  $2/3$ , or 0.67. Note that if the total number and identities of extra-generic hosts  
676 were known for P2 and P3, a “true” P:H for the genus could be calculated (see Synthesis, below).

677

678
